# Supplementary material
Source: Research Square preprint supplement (doi:10.21203/rs.3.rs-8612077/v1)
Supplement: Supplementary file 1 [file f90f8c071d76715b8d4ecc6a.pdf]

Supplementary material to: Socio-economic  
sensitivity to weather extremes: A scoping review  
of European research

**S1 Auxiliary search**

To ensure the robustness of our evidence base, we conducted a supplementary search using an alternative query specification. This secondary search was designed to capture relevant studies that might have been overlooked by the primary search string due to variations in terminology or indexing. All records identified through this complementary process were screened against the same inclusion and exclusion criteria outlined in the main protocol. This strategic addition resulted in the identification of 13 further studies that met all eligibility requirements and were integrated into the final corpus. The search query used in this supplementary phase is shown in Figure S1.

```
(weather OR climate OR rain* OR precipitation OR temperature) AND  
(shock* OR extreme OR variability) AND  
(economic* OR "socio-economy*" OR "sectoral impact*" OR "macroecon-  
omy*" OR inflation*) AND  
("Europe*" OR "Eurozone" OR "Austria*" OR "Belgium*" OR "Bul-  
garia*" OR "Croatia*" OR "Cyprus*" OR "Czech Republic*" OR "Den-  
mark*" OR "Estonia*" OR "Finland*" OR "France*" OR "Germany*" OR  
"Greece*" OR "Hungary*" OR "Iceland*" OR "Ireland*" OR "Italy*" OR  
"Latvia*" OR "Lithuania*" OR "Luxembourg*" OR "Malta*" OR  
"Netherlands*" OR "Norway*" OR "Poland*" OR "Portugal*" OR  
"Romania*" OR "Slovakia*" OR "Slovenia*" OR "Spain*" OR "Swe-  
den*" OR "Switzerland*" OR "United Kingdom*" OR "England*" OR  
"Scotland*" OR "Wales*" OR "Northern Ireland*")
```

**Fig. S1:** Auxiliary search query applied to Scopus and Web of Science databases.

047 **S2 Scoping review framework**

048

049

050

051

**Table S1:** Population–Concept–Context criteria for this review

| PCC element       | Definition                                                                                                                                                                                                                                                                                                                                                                                                                                                                                                                                                                                                                                                                                                                                                                                                                                                                                                                                                                                                                                                                                                              |
|-------------------|-------------------------------------------------------------------------------------------------------------------------------------------------------------------------------------------------------------------------------------------------------------------------------------------------------------------------------------------------------------------------------------------------------------------------------------------------------------------------------------------------------------------------------------------------------------------------------------------------------------------------------------------------------------------------------------------------------------------------------------------------------------------------------------------------------------------------------------------------------------------------------------------------------------------------------------------------------------------------------------------------------------------------------------------------------------------------------------------------------------------------|
| <i>Population</i> | Economic agents and systems in Europe: households, workers, firms, sectors, municipalities, regions, and countries. Studies with or without comparator groups; comparators may be temporal (before–after, anomalies) or cross-sectional (treated versus control areas).                                                                                                                                                                                                                                                                                                                                                                                                                                                                                                                                                                                                                                                                                                                                                                                                                                                 |
| <i>Concept</i>    | Sensitivity of the socioeconomic system to realised weather shocks or short-run weather variability; weather is treated as an explanatory factor for socioeconomic outcomes. Eligible study types: empirical primary studies (quantitative or mixed-methods) that estimate or describe realised impacts; multi-country panels and single-country studies are both eligible; systematic reviews are not included as primary evidence. Socioeconomic outcomes include, for example, prices and inflation, employment and unemployment, productivity and output, sectoral activity (e.g., agriculture, energy, transport, tourism), health service utilisation, crime, and financial market responses. Ineligible concepts: exposure-only assessments without sensitivity or realised impact; adaptation or forward-looking policy analyses without realised impacts; long-run climate trend analyses without a discrete shock; non-weather hazards (e.g., earthquakes, volcanic eruptions); methods/framework papers without empirical application; greenhouse-gas or air-pollution studies without a weather-shock link. |
| <i>Context</i>    | European settings: European Union member states, EEA, Schengen, the United Kingdom, and candidate or associated states; Russia and Turkey included. Global or multi-region studies are eligible when a European subsample or estimates are identifiable. Weather shocks/hazards operationalised as short-run extremes or anomalies, for example heatwaves, cold spells, storms, droughts, floods, extreme precipitation, and temperature anomalies, often defined relative to local historical distributions (e.g., tails such as 10th/90th percentiles) or via discrete event designations.                                                                                                                                                                                                                                                                                                                                                                                                                                                                                                                            |

070

071

072

073

074

075

076

077

078

079

080

081

082

083

084

085

086

087

088

089

090

091

092

| Concept                | Definition                                                                                                                                                                                                                                                             |
|------------------------|------------------------------------------------------------------------------------------------------------------------------------------------------------------------------------------------------------------------------------------------------------------------|
| Socio-economic outcome | A measurable effect on economic or social well-being, including but not limited to income, prices, employment, productivity, sectoral activity, health service use, crime, and financial market responses.                                                             |
| Sensitivity            | The degree to which a system is affected, adversely or beneficially, by weather variability or extremes through direct or indirect pathways.                                                                                                                           |
| Exposure               | The presence of people, livelihoods, assets, or infrastructure in places that could be affected by weather or climate events.                                                                                                                                          |
| Vulnerability          | The propensity to be adversely affected as a function of exposure, sensitivity, and adaptive capacity; in this review we map sensitivity and realised impacts rather than construct composite vulnerability indices.                                                   |
| Europe                 | European Union member states, EEA, Schengen, the United Kingdom, and candidate or associated states; Russia and Turkey are included; global or multi-region studies are eligible when European estimates are identifiable.                                             |
| Weather shock          | A short-run extreme or unusual realisation of weather or climate relative to local history, often operationalised by thresholds such as values beyond the 10th or 90th percentile or by discrete hazard events whose rarity and intensity vary by location and season. |

## S2.1 Journal selection criteria

To identify the most impactful and rigorous research within the broad search results, we applied a quality filter based on journal rankings. Specifically, we restricted inclusion to journals ranked in the first quartile (Q1) of the Scimago Journal Rankings (SJR) in their year of publication. If a ranking was unavailable for the specific publication year, the ranking from the nearest available year was used. This criterion ensures that the review captures studies that have met high standards of peer review and disciplinary impact, while also serving as a practical heuristic to manage the volume of records returned by the broad search string. The SJR data were retrieved from <https://www.scimagojr.com/journalrank.php>.

## S3 Supplementary Tables

**Table S3:** Summary of study characteristics: publication, region, and sector

| Publication                           | Region | EU region      | Sector            |
|---------------------------------------|--------|----------------|-------------------|
| <a href="#">Achebak et al. (2024)</a> | Spain  | Spain          | Health            |
| <a href="#">Ahmed et al. (2024)</a>   | London | United Kingdom | Financial markets |

139 **Table S3:** Summary of study characteristics: publication, region, and sector (contin-  
 140 ued)  
 141

| 142 | Publication                  | Region                                             | EU region                         | Sector               |
|-----|------------------------------|----------------------------------------------------|-----------------------------------|----------------------|
| 143 | Bastos et al. (2013)         | Global                                             | Global                            | Agriculture          |
| 144 | Beirne et al. (2024)         | Eurozone                                           | Eurozone                          | Macroeconomy         |
| 145 | Berg et al. (2024)           | Global                                             | Global                            | Macroeconomy         |
| 146 | Bigerna (2018)               | Italy                                              | Italy                             | Energy               |
| 147 | Bigler and Janzen (2024)     | Germany                                            | Germany                           | Health               |
| 148 | Black et al. (2013)          | Global                                             | Global                            | Review               |
| 149 | Blumenthal and Nyberg (2019) | Sweden                                             | Sweden                            | Economy              |
| 150 | Boccard (2018)               | France                                             | France                            | Economy              |
| 151 | Cai et al. (2016)            | OECD                                               | OECD                              | Migration            |
| 152 | Cashin et al. (2017)         | Global                                             | Global                            | Macroeconomy         |
| 153 | Cevik and Gwon (2024)        | China, Japan, Korea, United Kingdom, United States | Eurozone, Eurozone, United States | Macroeconomy         |
| 154 | Chabot and Bertrand (2023)   | Europe                                             | Europe                            | Financial markets    |
| 155 | Chambru (2020)               | Switzerland                                        | Switzerland                       | Crime and conflict   |
| 156 | Chen et al. (2023)           | Global                                             | Global                            | Health               |
| 157 | Chen et al. (2021)           | Global                                             | Global                            | Energy               |
| 158 | Ciccarelli et al. (2024)     | Germany, Italy, Spain                              | France, Germany, Italy, Spain     | France, Macroeconomy |
| 159 | Colelli et al. (2023)        | Europe, India                                      | Europe                            | Energy               |

| Publication                  | Region                                             | EU region                      | Sector                                                                    |
|------------------------------|----------------------------------------------------|--------------------------------|---------------------------------------------------------------------------|
| Crispino and Loberto (2024)  | Italy                                              | Italy                          | Politics                                                                  |
| Díaz et al. (2015)           | Madrid                                             | Spain                          | Health                                                                    |
| Donadelli et al. (2021)      | G7, OECD                                           | G7, OECD                       | Economy                                                                   |
| Donadelli et al. (2022)      | Global                                             | Global                         | Macroeconomy                                                              |
| Drescher and Janzen (2025)   | Switzerland                                        | Switzerland                    | Health                                                                    |
| Ellena et al. (2022)         | Turin                                              | Italy                          | Health                                                                    |
| Falk (2013)                  | Austria                                            | Austria                        | Tourism                                                                   |
| Felbermayr et al. (2022)     | Global                                             | Global                         | Economy                                                                   |
| Gössling et al. (2023)       | Global                                             | Global                         | Review                                                                    |
| Gupta et al. (2023)          | France, Netherlands, Japan, Spain, Kingdom, States | Germany, Italy, United Kingdom | France, Netherlands, Spain, United Kingdom, Germany, Italy, United States |
| Hoffmann et al. (2022)       | Europe                                             | Europe                         | Politics                                                                  |
| Huang and Hong (2024)        | Global                                             | Global                         | Health                                                                    |
| Jennings and Gray (2015)     | Netherlands                                        | Netherlands                    | Migration                                                                 |
| Kahn et al. (2021)           | Global                                             | Global                         | Economy                                                                   |
| Karlsson and Ziebarth (2018) | Germany                                            | Germany                        | Health                                                                    |
| Khan et al. (2017)           | Global                                             | Global                         | Economy                                                                   |
| Kotz et al. (2021)           | Global                                             | Global                         | Economy                                                                   |

231 **Table S3:** Summary of study characteristics: publication, region, and sector (contin-  
232 ued)  
233

| 234 | Publication                        | Region                          | EU region                                      | Sector                       |
|-----|------------------------------------|---------------------------------|------------------------------------------------|------------------------------|
| 235 | Kotz et al. (2024)                 | Global                          | Global                                         | Economy                      |
| 236 | Letta and Tol (2019)               | Global                          | Global                                         | Macroeconomy                 |
| 237 | Linsenmeier (2023)                 | Global                          | Global                                         | Economy                      |
| 238 | Lis and Nickel (2010)              | Global                          | Global                                         | Macroeconomy                 |
| 239 | Lpez-Bueno et al. (2019)           | Madrid                          | Spain                                          | Health                       |
| 240 | Lpez-Bueno et al. (2020b)          | Madrid                          | Spain                                          | Health                       |
| 241 | Lpez-Bueno et al. (2021)           | Madrid                          | Spain                                          | Health                       |
| 242 | Lpez-Bueno et al. (2020a)          | Madrid                          | Spain                                          | Health                       |
| 243 | Lpez-Bueno et al. (2022)           | Spain                           | Spain                                          | Health                       |
| 244 | Lucidi et al. (2024)               | Belgium, Germany, Italy, Spain  | France, Belgium, Greece, Germany, Italy, Spain | France, Greece, Macroeconomy |
| 245 | Mannell et al. (2024)              | Global                          | Global                                         | Crime and conflict           |
| 246 | Marinaccio et al. (2019)           | Italy                           | Italy                                          | Health                       |
| 247 | Martnez-Solanas and Basagaa (2019) | Spain                           | Spain                                          | Health                       |
| 248 | Middelanis et al. (2023)           | Global                          | Global                                         | Macroeconomy                 |
| 249 | Miller et al. (2021)               | Global                          | Global                                         | Macroeconomy                 |
| 250 | Mosquera-Lpez et al. (2024)        | Denmark, Germany, Norway, Spain | France, Denmark, Italy, Germany, Norway, Spain | France, Italy, Energy        |
| 251 | Mukherjee and Ouattara (2021)      | Global                          | Global                                         | Macroeconomy                 |

252  
253  
254  
255  
256  
257  
258  
259  
260  
261  
262  
263  
264  
265  
266  
267  
268  
269  
270  
271  
272  
273  
274  
275  
276

| Publication                       | Region                         | EU region                      | Sector             |                                                      |
|-----------------------------------|--------------------------------|--------------------------------|--------------------|------------------------------------------------------|
| Mumtaz and Theophilopoulou (2024) | Global                         | Global                         | Economy            | 277<br>278<br>279<br>280<br>281<br>282<br>283<br>284 |
| Otrachshenko and Popova (2022)    | Russia                         | Russia                         | Economy            | 285<br>286<br>287                                    |
| Otrachshenko et al. (2021)        | Russia                         | Russia                         | Crime and conflict | 288<br>289                                           |
| Otrachshenko et al. (2017)        | Russia                         | Russia                         | Health             | 290<br>291                                           |
| Pablo-Romero et al. (2019)        | Spain                          | Spain                          | Energy             | 292<br>293<br>294                                    |
| Paglialunga et al. (2022)         | Global                         | Global                         | Inequality         | 295<br>296                                           |
| Peillex et al. (2021)             | France                         | France                         | Financial markets  | 297<br>298                                           |
| Quante et al. (2024)              | Global                         | Global                         | Economy            | 299<br>300<br>301                                    |
| Rubio-Cabaez (2024)               | Spain                          | Spain                          | Health             | 302<br>303<br>304                                    |
| Russ (2020)                       | Global                         | Global                         | Economy            | 305                                                  |
| Saucy et al. (2021)               | Zurich                         | Switzerland                    | Health             | 306<br>307                                           |
| Schleypen et al. (2022)           | European Union, United Kingdom | European Union, United Kingdom | Economy            | 308<br>309                                           |
| Schmitt et al. (2022)             | Germany                        | Germany                        | Agriculture        | 310<br>311                                           |
| Semenova (2024)                   | Global                         | Global                         | Review             | 312<br>313                                           |
| Sheng et al. (2023)               | United Kingdom                 | United Kingdom                 | Inequality         | 314<br>315                                           |
| Tol (2024)                        | Global                         | Global                         | Review             | 316                                                  |
| Ubilava (2017)                    | Global                         | Global                         | Agriculture        | 317<br>318                                           |
| Ubilava and Abdolrahimi (2019)    | Global                         | Global                         | Agriculture        | 319<br>320<br>321<br>322                             |

323 **Table S3:** Summary of study characteristics: publication, region, and sector (contin-  
 324 ued)  
 325

| 326 | Publication                                           | Region  | EU region | Sector                      |
|-----|-------------------------------------------------------|---------|-----------|-----------------------------|
| 327 | <a href="#">Verschuur et al. (2023)</a>               | Global  | Global    | Supply chains, Econ-<br>omy |
| 328 | <a href="#">Vielma et al. (2024)</a>                  | Spain   | Spain     | Health                      |
| 329 | <a href="#">von Möllendorff and Hirschfeld (2016)</a> | Germany | Germany   | Well-being                  |
| 330 | <a href="#">Waldinger (2024)</a>                      | France  | France    | Crime and conflict          |
| 331 | <a href="#">Wasko et al. (2021)</a>                   | Global  | Global    | Economy                     |
| 332 | <a href="#">Zou et al. (2024)</a>                     | Global  | Global    | Agriculture                 |

343  
 344  
 345  
 346 **Table S4:** Summary of study characteristics: publication, outcomes, and data  
 347 granularity

| 348 | Publication                              | Outcome studied                          | Temp.<br>period. | Spatial<br>res. |
|-----|------------------------------------------|------------------------------------------|------------------|-----------------|
| 349 | <a href="#">Achebak et al. (2024)</a>    | hospitalisation                          | daily            | province        |
| 350 | <a href="#">Ahmed et al. (2024)</a>      | stock returns, daily FTSE100 stock index | daily            | -               |
| 351 | <a href="#">Bastos et al. (2013)</a>     | economic , macroeconomic , agriculture   | annual           | country         |
| 352 | <a href="#">Beirne et al. (2024)</a>     | economic, macroeconomic, inflation       | monthly          | country         |
| 353 | <a href="#">Berg et al. (2024)</a>       | gdp per capita                           | annual           | country         |
| 354 | <a href="#">Bigerna (2018)</a>           | electricity prices                       | hourly           | -               |
| 355 | <a href="#">Bigler and Janzen (2024)</a> | sleep                                    | daily            | NUTS 3          |
| 356 | <a href="#">Black et al. (2013)</a>      | -                                        | -                | -               |

367  
 368

| Publication                  | Outcome studied                                   | Temp. period. | Spatial res. |     |
|------------------------------|---------------------------------------------------|---------------|--------------|-----|
|                              |                                                   |               |              | 369 |
|                              |                                                   |               |              | 370 |
|                              |                                                   |               |              | 371 |
|                              |                                                   |               |              | 372 |
|                              |                                                   |               |              | 373 |
|                              |                                                   |               |              | 374 |
| Blumenthal and Nyberg (2019) | insurance, flood damage                           | daily         | -            | 375 |
|                              |                                                   |               |              | 376 |
| Boccard (2018)               | economic, insurance                               | annual        | country      | 377 |
| Cai et al. (2016)            | migration , agriculture , GDP                     | annual        | country      | 378 |
|                              |                                                   |               |              | 379 |
| Cashin et al. (2017)         | inflation , GDP , exchange rates , interest rates | quarterly     | country      | 380 |
|                              |                                                   |               |              | 381 |
| Cevik and Gwon (2024)        | inflation , supply chains                         | monthly       | country      | 382 |
|                              |                                                   |               |              | 383 |
| Chabot and Bertrand (2023)   | financial stability, gdp                          | monthly       | country      | 384 |
|                              |                                                   |               |              | 385 |
|                              |                                                   |               |              | 386 |
| Chambru (2020)               | crime , prices , migration                        | annual        | region       | 387 |
|                              |                                                   |               |              | 388 |
| Chen et al. (2023)           | meningitis                                        | annual        | country      | 389 |
|                              |                                                   |               |              | 390 |
| Chen et al. (2021)           | energy                                            | annual        | country      | 391 |
|                              |                                                   |               |              | 392 |
| Ciccarelli et al. (2024)     | inflation                                         | monthly       | country      | 393 |
|                              |                                                   |               |              | 394 |
| Colelli et al. (2023)        | electricity load                                  | monthly       | country      | 395 |
|                              |                                                   |               |              | 396 |
| Crispino and Loberto (2024)  | awareness to climate change                       | weekly        | NUTS 3       | 397 |
|                              |                                                   |               |              | 398 |
| Díaz et al. (2015)           | mortality                                         | daily         | city         | 399 |
|                              |                                                   |               |              | 400 |
| Donadelli et al. (2021)      | R & D                                             | annual        | country      | 401 |
|                              |                                                   |               |              | 402 |
| Donadelli et al. (2022)      | gdp , capital , productivity                      | daily         | country      | 403 |
|                              |                                                   |               |              | 404 |
| Drescher and Janzen (2025)   | occupational injuries                             | annual        | canton       | 405 |
|                              |                                                   |               |              | 406 |
| Ellena et al. (2022)         | mortality                                         | daily         | -            | 407 |
|                              |                                                   |               |              | 408 |
| Falk (2013)                  | tourist stays                                     | annual        | -            | 409 |
|                              |                                                   |               |              | 410 |
| Felbermayr et al. (2022)     | economic activity                                 | annual        | grid         | 411 |
|                              |                                                   |               |              | 412 |
|                              |                                                   |               |              | 413 |
|                              |                                                   |               |              | 414 |

415 **Table S4:** Summary of study characteristics: publication, outcomes, and data  
416 granularity (continued)  
417

| 418 | Publication                                | Outcome studied                          | Temp.<br>419 period. | Spatial<br>res.               |
|-----|--------------------------------------------|------------------------------------------|----------------------|-------------------------------|
| 420 | Gössling et al. -<br>421 (2023)            |                                          | -                    | -                             |
| 422 | Gupta et al.<br>423 (2023)                 | real gdp                                 | annual               | country                       |
| 424 | Hoffmann et al.<br>425 (2022)              | politics, voting                         | annual               | NUTS 3                        |
| 426 | Huang and<br>427 Hong (2024)               | adult obesity rate, inequality           | annual               | country                       |
| 428 | Jennings and<br>429 Gray (2015)            | human migration                          | annual               | municipality                  |
| 430 | Kahn et al.<br>431 (2021)                  | real gdp per capita                      | annual               | country                       |
| 432 | Karlsson<br>433 and Ziebarth<br>434 (2018) | mortality                                | daily                | county                        |
| 435 | Khan et al.<br>436 (2017)                  | per capita gdp growth, gdp, inequality   | annual               | country-<br>437 basin<br>unit |
| 438 | Kotz et al.<br>439 (2021)                  | Gross Regional Product                   | annual               | subnational                   |
| 440 | Kotz et al.<br>441 (2024)                  | inflation                                | monthly              | country                       |
| 442 | Letta and Tol<br>443 (2019)                | total factor productivity, inequality    | annual               | country                       |
| 444 | Linsenmeier<br>445 (2023)                  | economic activity                        | daily                | country                       |
| 446 | Lis and Nickel<br>447 (2010)               | government budget balance, fiscal policy | annual               | country                       |
| 448 | Lpez-Bueno<br>449 et al. (2019)            | mortality                                | daily                | city                          |
| 450 | Lpez-Bueno<br>451 et al. (2020b)           | mortality                                | daily                | district                      |
| 452 | Lpez-Bueno<br>453 et al. (2021)            | mortality                                | daily                | municipality                  |
| 454 | Lpez-Bueno<br>455 et al. (2020a)           | mortality                                | daily                | district                      |
| 456 | Lpez-Bueno<br>457 et al. (2022)            | mortality rate                           | monthly              | municipality                  |
| 458 |                                            |                                          |                      |                               |
| 459 |                                            |                                          |                      |                               |
| 460 |                                            |                                          |                      |                               |

| Publication                        | Outcome studied                                                 | Temp. period. | Spatial res. |     |
|------------------------------------|-----------------------------------------------------------------|---------------|--------------|-----|
|                                    |                                                                 |               |              | 461 |
|                                    |                                                                 |               |              | 462 |
|                                    |                                                                 |               |              | 463 |
|                                    |                                                                 |               |              | 464 |
|                                    |                                                                 |               |              | 465 |
|                                    |                                                                 |               |              | 466 |
| Lucidi et al. (2024)               | inflation, energy prices, food prices                           | monthly       | NUTS 2       | 467 |
| Mannell et al. (2024)              | violence, intimate partner violence                             | annual        | country      | 468 |
| Marinaccio et al. (2019)           | occupational injuries                                           | daily         | municipality | 469 |
| Martnez-Solanas and Basagaa (2019) | mortality                                                       | daily         | province     | 470 |
|                                    |                                                                 |               |              | 471 |
|                                    |                                                                 |               |              | 472 |
| Middelanis et al. (2023)           | economy , prices , consumption                                  | daily         | country      | 473 |
|                                    |                                                                 |               |              | 474 |
| Miller et al. (2021)               | per-capita GDP, agriculture, crop production                    | annual        | country      | 475 |
|                                    |                                                                 |               |              | 476 |
| Mosquera-Lpez et al. (2024)        | energy , electricity                                            | daily         | country      | 477 |
|                                    |                                                                 |               |              | 478 |
| Mukherjee and Ouattara (2021)      | inflation , real gdp , government spending , monetary aggregate | annual        | country      | 479 |
|                                    |                                                                 |               |              | 480 |
|                                    |                                                                 |               |              | 481 |
| Mumtaz and Theophilopoulou (2024)  | per capita gdp , inequality                                     | annual        | country      | 482 |
|                                    |                                                                 |               |              | 483 |
|                                    |                                                                 |               |              | 484 |
| Otrachshenko and Popova (2022)     | real per capita gdp, inequality, income                         | annual        | regional     | 485 |
|                                    |                                                                 |               |              | 486 |
| Otrachshenko et al. (2021)         | violence, homicides                                             | annual        | regional     | 487 |
|                                    |                                                                 |               |              | 488 |
| Otrachshenko et al. (2017)         | mortality                                                       | annual        | regional     | 489 |
|                                    |                                                                 |               |              | 490 |
| Pablo-Romero et al. (2019)         | electricity consumption, tourism                                | annual        | province     | 491 |
|                                    |                                                                 |               |              | 492 |
| Paglalunga et al. (2022)           | gini index                                                      | annual        | municipality | 493 |
|                                    |                                                                 |               |              | 494 |
| Peillex et al. (2021)              | finance , stock market                                          | daily         | country      | 495 |
|                                    |                                                                 |               |              | 496 |
| Quante et al. (2024)               | income, consumption, inequality                                 | daily         | country      | 497 |
|                                    |                                                                 |               |              | 498 |
| Rubio-Cabaez (2024)                | birth weights                                                   | monthly       | municipality | 499 |
|                                    |                                                                 |               |              | 500 |
|                                    |                                                                 |               |              | 501 |
|                                    |                                                                 |               |              | 502 |
|                                    |                                                                 |               |              | 503 |
|                                    |                                                                 |               |              | 504 |
|                                    |                                                                 |               |              | 505 |
|                                    |                                                                 |               |              | 506 |

507 **Table S4:** Summary of study characteristics: publication, outcomes, and data  
508 granularity (continued)  
509

---

| 510 | Publication                                            | Outcome studied                                                  | Temp.<br>511 period. | Spatial<br>res. |
|-----|--------------------------------------------------------|------------------------------------------------------------------|----------------------|-----------------|
| 512 | Russ (2020)                                            | economic activity, agricultural productivity,<br>513 agriculture | annual               | country         |
| 514 | Saucy et al.<br>515 (2021)                             | mortality                                                        | daily                | grid            |
| 516 | Schleypen et al.<br>517 (2022)                         | gross value-added , labour productivity                          | annual               | NUTS 2          |
| 518 | Schmitt et al.<br>519 (2022)                           | agriculture, crop yield                                          | annual               | municipality    |
| 520 | Semenova<br>521 (2024)                                 | -                                                                | -                    | -               |
| 522 | Sheng et al.<br>523 (2023)                             | wealth inequality                                                | monthly              | country         |
| 524 | Tol (2024)                                             | -                                                                | -                    | -               |
| 525 | Ubilava (2017)                                         | wheat prices, agriculture                                        | monthly              | country         |
| 526 | Ubilava and<br>527 Abdolrahimi                         | agriculture, crop yields, inequality                             | annual               | country         |
| 528 | (2019)                                                 |                                                                  |                      |                 |
| 529 | Verschuur et al.<br>530 (2023)                         | ports , shipping                                                 | annual               | country         |
| 531 | Vielma et al.<br>532 (2024)                            | occupational injuries                                            | daily                | NUTS 3          |
| 533 | von<br>534 Möllendorff<br>and Hirschfeld<br>535 (2016) | life satisfaction                                                | annual               | NUTS 3          |
| 536 | Waldinger<br>537 (2024)                                | conflict, politics                                               | annual               | canton          |
| 538 | Wasko et al.<br>539 (2021)                             | insurance, economic loss                                         | annual               | country         |
| 540 | Zou et al.<br>541 (2024)                               | agricultural total factor productivity,<br>542 inequality        | annual               | country         |

---

543  
544  
545  
546  
547  
548  
549  
550  
551  
552

| Table S5: Weather variables and methods used in the reviewed studies |                                           |                                                                                                              |                                                                                                         | 553                                                  |
|----------------------------------------------------------------------|-------------------------------------------|--------------------------------------------------------------------------------------------------------------|---------------------------------------------------------------------------------------------------------|------------------------------------------------------|
| Publication                                                          | Weather studied                           | Weather measure                                                                                              | Methodology                                                                                             | 554                                                  |
| Achebak et al. (2024)                                                | temperature, humidity                     | cross-basis function of temperature                                                                          | quasi-Poisson generalized linear regression, distributed lag non-linear model, multilevel meta-analysis | 555<br>556<br>557<br>558<br>559<br>560<br>561<br>562 |
| Ahmed et al. (2024)                                                  | temperature, humidity, clouds, visibility | moving average of weather variables, moving standard deviation, extreme above-average, extreme below-average | GARCH, logit model, OLS regression                                                                      | 563<br>564<br>565<br>566<br>567                      |
| Bastos et al. (2013)                                                 | precipitation                             | annual precipitation                                                                                         | fixed effects panel regression, Tobit random effects estimator                                          | 568<br>569<br>570                                    |
| Beirne et al. (2024)                                                 | extreme weather events                    | extreme weather events                                                                                       | panel structural VAR                                                                                    | 571<br>572                                           |
| Berg et al. (2024)                                                   | temperature                               | population weighted temperature, two-factor decomposition of temperature, cold days, hot days, normal days   | local projections                                                                                       | 573<br>574<br>575<br>576<br>577                      |
| Bigerna (2018)                                                       | temperature                               | hourly temperature, cooling degree hours, heating degree hours                                               | VAR                                                                                                     | 578<br>579<br>580                                    |
| Bigler and Janzen (2024)                                             | temperature, precipitation, cloud cover   | discretised bins of minimum daily temperature                                                                | fixed effects panel regression                                                                          | 581<br>582<br>583                                    |
| Black et al. (2013)                                                  | -                                         | -                                                                                                            | -                                                                                                       | 584<br>585                                           |
| Blumenthal and Nyberg (2019)                                         | precipitation                             | precipitation                                                                                                | linear regression                                                                                       | 586<br>587<br>588                                    |
| Boccard (2018)                                                       | extreme weather events                    | floods, droughts, heatwaves                                                                                  | fixed effects panel regression                                                                          | 589<br>590<br>591                                    |
| Cai et al. (2016)                                                    | temperature, precipitation                | annual mean monthly total precipitation, annual mean temperature                                             | fixed effects panel regression                                                                          | 592<br>593<br>594<br>595                             |
| Cashin et al. (2017)                                                 | ENSO                                      | southern oscillation index anomaly                                                                           | local projections, VARX, global VAR                                                                     | 596<br>597<br>598                                    |

599  
600 **Table S5:** Weather variables and methods used in the reviewed studies (continued)

| 601 Publication                                 | 602 Weather stud-<br>ied                                                    | 603 Weather measure                                                                                                                                     | 604 Methodology                                          |
|-------------------------------------------------|-----------------------------------------------------------------------------|---------------------------------------------------------------------------------------------------------------------------------------------------------|----------------------------------------------------------|
| 603 <a href="#">Cevik and Gwon (2024)</a>       | 604 temperature                                                             | 605 temperature anomaly                                                                                                                                 | 606 structural VAR, local<br>607 projections             |
| 608 <a href="#">Chabot and Bertrand (2023)</a>  | 609 temperature,<br>610 precipitation,<br>611 extreme<br>612 weather events | 613 temperature anomaly,<br>614 number of floods,<br>615 number of heatwaves,<br>616 number of droughts,<br>617 number of coldwaves                     | 618 fixed effects panel regres-<br>619 sion              |
| 620 <a href="#">Chambru (2020)</a>              | 621 temperature                                                             | 622 precipitation anomaly,<br>623 temperature anomaly,<br>624 mean seasonal annual<br>625 temperature, mean<br>626 seasonal annual<br>627 precipitation | 628 fixed effects panel regres-<br>629 sion              |
| 630 <a href="#">Chen et al. (2023)</a>          | 631 temperature,<br>632 precipitation,<br>633 wind speed                    | 634 maximum temperature,<br>635 average precipitation,<br>636 temperature variability                                                                   | 637 generalized linear model                             |
| 638 <a href="#">Chen et al. (2021)</a>          | 639 temperature,<br>640 precipitation                                       | 641 extreme temperature<br>642 events, droughts, floods                                                                                                 | 643 fixed effects panel quan-<br>644 tile regression     |
| 645 <a href="#">Ciccarelli et al. (2024)</a>    | 646 temperature                                                             | 647 temperature anomaly<br>648 from historical mean                                                                                                     | 649 Bayesian VAR                                         |
| 650 <a href="#">Colelli et al. (2023)</a>       | 651 temperature                                                             | 652 30-year moving aver-<br>653 age of the daily maxi-<br>654 mum temperature, tem-<br>655 perature anomaly, daily<br>656 temperature bins              | 657 fixed effects panel regres-<br>658 sion              |
| 659 <a href="#">Crispino and Loberto (2024)</a> | 660 temperature                                                             | 661 temperature anomaly                                                                                                                                 | 662 fixed-effects Poisson<br>663 panel regression        |
| 664 <a href="#">Díaz et al. (2015)</a>          | 665 temperature,<br>666 pressure,<br>667 humidity                           | 668 cold waves, mean daily<br>669 air pressure, mean<br>670 daily relative humidity,<br>671 daily minimum and<br>672 maximum temperature                | 673 Poisson regression                                   |
| 674 <a href="#">Donadelli et al. (2021)</a>     | 675 temperature                                                             | 676 global annual tempera-<br>677 ture, mean annual tem-<br>678 perature                                                                                | 679 panel VAR, stochastic<br>680 endogenous growth model |
| 681 <a href="#">Donadelli et al. (2022)</a>     | 682 temperature                                                             | 683 annual temperature<br>684 volatility                                                                                                                | 685 panel VAR                                            |

642  
643  
644

**Table S5:** Weather variables and methods used in the reviewed studies (continued)

| Publication                | Weather studied                                         | Weather measure                                                                                               | Methodology                                                                   |
|----------------------------|---------------------------------------------------------|---------------------------------------------------------------------------------------------------------------|-------------------------------------------------------------------------------|
| Drescher and Janzen (2025) | temperature, precipitation, solar radiation, wind speed | temperature bins                                                                                              | Poisson fixed effects model                                                   |
| Ellena et al. (2022)       | temperature                                             | daily mean temperature                                                                                        | quasi-Poisson generalized linear regression, distributed lag non-linear model |
| Falk (2013)                | temperature, clouds, snow depth, clear skies            | average monthly temperatures, maximum monthly snow depth, percentage of days with clear skies, cloud cover    | panel error correction model                                                  |
| Felbermayr et al. (2022)   | temperature, precipitation, wind speed                  | precipitation anomalies, SPEI, cold spells, storms                                                            | spatial Durbin model, fixed effects panel regression                          |
| Gössling et al. (2023)     | -                                                       | -                                                                                                             | -                                                                             |
| Gupta et al. (2023)        | temperature                                             | global temperature anomaly                                                                                    | probit                                                                        |
| Hoffmann et al. (2022)     | temperature, precipitation, evapotranspiration, UTCI    | temperature anomaly, heatwaves, cold spells, hot days, cold days, dry spells, wet spells                      | fixed effects panel regression                                                |
| Huang and Hong (2024)      | temperature                                             | annual mean temperature, temperature bins, seasonal mean temperature, temperature anomaly, temperature shocks | fixed effects panel regression                                                |
| Jennings and Gray (2015)   | temperature, riverine flooding, precipitation           | mean annual temperature, tropical days, cold days, riverine flooding, total annual precipitation              | multinomial logit model                                                       |

691  
692 **Table S5:** Weather variables and methods used in the reviewed studies (continued)  
693  
694

| 695                                | 696                                      | 697                                                                                                                                                                                                                 | 698                                                                     | 699 | 700 |
|------------------------------------|------------------------------------------|---------------------------------------------------------------------------------------------------------------------------------------------------------------------------------------------------------------------|-------------------------------------------------------------------------|-----|-----|
| 701                                | 702                                      | 703                                                                                                                                                                                                                 | 704                                                                     | 705 | 706 |
| 707                                | 708                                      | 709                                                                                                                                                                                                                 | 710                                                                     | 711 | 712 |
| 713                                | 714                                      | 715                                                                                                                                                                                                                 | 716                                                                     | 717 | 718 |
| 719                                | 720                                      | 721                                                                                                                                                                                                                 | 722                                                                     | 723 | 724 |
| 725                                | 726                                      | 727                                                                                                                                                                                                                 | 728                                                                     | 729 | 730 |
| 731                                | 732                                      | 733                                                                                                                                                                                                                 | 734                                                                     | 735 | 736 |
| Publication                        | Weather stud-<br>ied                     | Weather measure                                                                                                                                                                                                     | Methodology                                                             |     |     |
| Kahn et al.<br>(2021)              | temperature,<br>precipitation            | mean annual temper-<br>ature, mean annual<br>precipitation, pre-<br>cipitation anomaly,<br>temperature anomaly                                                                                                      | panel ARDL                                                              |     |     |
| Karlsson<br>and Ziebarth<br>(2018) | temperature,<br>precipitation            | hot days, cold days,<br>temperature bins                                                                                                                                                                            | fixed effects panel regres-<br>sion, random effects Pois-<br>son models |     |     |
| Khan et al.<br>(2017)              | temperature,<br>precipitation,<br>runoff | weighted anomaly stan-<br>dardized precipitation,<br>weighted anomaly stan-<br>dardized runoff, mean<br>annual precipitation,<br>mean annual temper-<br>ature, squared annual<br>temperature, mean<br>annual runoff | fixed effects panel regres-<br>sion                                     |     |     |
| Kotz et al.<br>(2021)              | temperature,<br>precipitation            | annual average intra-<br>monthly standard devi-<br>ation of daily tempera-<br>ture                                                                                                                                  | fixed effects panel regres-<br>sion                                     |     |     |
| Kotz et al.<br>(2024)              | temperature,<br>precipitation            | average temperature,<br>temperature standard<br>deviations, 99th per-<br>centile of daily rainfall,<br>SPEI                                                                                                         | fixed effects panel regres-<br>sion                                     |     |     |
| Letta and Tol<br>(2019)            | temperature,<br>precipitation            | annual temperature<br>change, annual change<br>in precipitation lev-<br>els, squared annual<br>temperature change                                                                                                   | fixed effects panel regres-<br>sion                                     |     |     |

| <b>Table S5:</b> Weather variables and methods used in the reviewed studies (continued) |                                                                        |                                                                                                                                                                                                                                                                                                                    |                                                                                                                  | 737                                                                                                          |
|-----------------------------------------------------------------------------------------|------------------------------------------------------------------------|--------------------------------------------------------------------------------------------------------------------------------------------------------------------------------------------------------------------------------------------------------------------------------------------------------------------|------------------------------------------------------------------------------------------------------------------|--------------------------------------------------------------------------------------------------------------|
| Publication                                                                             | Weather stud-<br>ied                                                   | Weather measure                                                                                                                                                                                                                                                                                                    | Methodology                                                                                                      | 738                                                                                                          |
| Linsenmeier<br>(2023)                                                                   | temperature,<br>precipitation,<br>humidity,<br>radiation               | mean temperature,<br>day-to-day temperature<br>variability, seasonal<br>temperature variability,<br>annual total<br>precipitation, seasonal<br>precipitation variability,<br>interannual variability<br>of temperature and<br>precipitation, annual<br>mean relative humid-<br>ity, annual mean solar<br>radiation | spatial first differences                                                                                        | 739<br>740<br>741<br>742<br>743<br>744<br>745<br>746<br>747<br>748<br>749<br>750<br>751<br>752<br>753<br>754 |
| Lis and Nickel<br>(2010)                                                                | extreme<br>weather events                                              | extreme weather events                                                                                                                                                                                                                                                                                             | fixed effects panel regres-<br>sion                                                                              | 755<br>756                                                                                                   |
| Lpez-Bueno<br>et al. (2019)                                                             | temperature                                                            | cold waves                                                                                                                                                                                                                                                                                                         | generalized linear models                                                                                        | 757<br>758                                                                                                   |
| Lpez-Bueno<br>et al. (2020b)                                                            | temperature                                                            | cold wave                                                                                                                                                                                                                                                                                                          | generalized linear models                                                                                        | 759<br>760                                                                                                   |
| Lpez-Bueno<br>et al. (2021)                                                             | temperature                                                            | cold wave                                                                                                                                                                                                                                                                                                          | generalized linear models                                                                                        | 761<br>762                                                                                                   |
| Lpez-Bueno<br>et al. (2020a)                                                            | temperature                                                            | heatwaves                                                                                                                                                                                                                                                                                                          | generalized linear models                                                                                        | 763<br>764                                                                                                   |
| Lpez-Bueno<br>et al. (2022)                                                             | temperature                                                            | minimum daily temper-<br>ature                                                                                                                                                                                                                                                                                     | mixed generalized linear<br>model                                                                                | 765<br>766                                                                                                   |
| Lucidi et al.<br>(2024)                                                                 | temperature                                                            | temperature anomaly                                                                                                                                                                                                                                                                                                | local projections                                                                                                | 767<br>768                                                                                                   |
| Mannell et al.<br>(2024)                                                                | extreme tem-<br>peratures,<br>droughts,<br>floods, storms,<br>wildfire | count of climate shock<br>indicators                                                                                                                                                                                                                                                                               | structural equation<br>model, exploratory factor<br>analysis                                                     | 769<br>770<br>771<br>772<br>773<br>774                                                                       |
| Marinaccio<br>et al. (2019)                                                             | temperature                                                            | daily mean temperature                                                                                                                                                                                                                                                                                             | Poisson generalized linear<br>regression, distributed lag<br>non-linear model, multi-<br>variate meta-regression | 775<br>776<br>777<br>778                                                                                     |
| Martnez-<br>Solanas and<br>Basagaa (2019)                                               | temperature                                                            | daily maximum temper-<br>ature, heatwaves                                                                                                                                                                                                                                                                          | distributed lag non-linear<br>model, multivariate meta-<br>regression                                            | 779<br>780<br>781<br>782                                                                                     |

783  
784 **Table S5:** Weather variables and methods used in the reviewed studies (continued)

| 785 Publication                                       | 786 Weather studied                                                               | 787 Weather measure                                                                                                                                     | 788 Methodology                                      |
|-------------------------------------------------------|-----------------------------------------------------------------------------------|---------------------------------------------------------------------------------------------------------------------------------------------------------|------------------------------------------------------|
| 788 <a href="#">Middelanis et al. (2023)</a>          | 789 heat stress, -<br>790 floods, tropical<br>791 cyclones                        | 787 -                                                                                                                                                   | 788 global agent-based loss<br>789 propagation model |
| 791 <a href="#">Miller et al. (2021)</a>              | 792 temperature,<br>793 precipitation                                             | 794 annual precipitation,<br>795 average annual<br>796 temperature, heatwaves                                                                           | 797 fixed effects panel regres-<br>798 sion          |
| 794 <a href="#">Mosquera-Lpez et al. (2024)</a>       | 795 temperature,<br>796 wind speed,<br>797 precipitation,<br>798 solar irradiance | 799 daily temperature, daily<br>800 wind speed, daily pre-<br>801 cipitation, daily solar<br>802 irradiance                                             | 803 distributed lag non-linear<br>804 model          |
| 798 <a href="#">Mukherjee and Ouattara (2021)</a>     | 799 temperature                                                                   | 800 temperature change                                                                                                                                  | 801 panel VAR                                        |
| 801 <a href="#">Mumtaz and Theophilopoulou (2024)</a> | 802 temperature,<br>803 precipitation                                             | 804 annual mean tempera-<br>805 ture, annual precipita-<br>806 tion                                                                                     | 807 Bayesian panel VAR                               |
| 804 <a href="#">Otrachshenko and Popova (2022)</a>    | 805 temperature,<br>806 precipitation                                             | 807 precipitation bins, tem-<br>808 perature bins                                                                                                       | 809 fixed effects panel regres-<br>810 sion          |
| 807 <a href="#">Otrachshenko et al. (2021)</a>        | 808 temperature,<br>809 precipitation                                             | 810 precipitation bins, tem-<br>811 perature bins                                                                                                       | 812 fixed effects panel regres-<br>813 sion          |
| 810 <a href="#">Otrachshenko et al. (2017)</a>        | 811 temperature,<br>812 precipitation                                             | 813 cooling degree days,<br>814 heating degree days,<br>815 squared cooling degree<br>816 days, squared heating<br>817 degree days                      | 818 fixed effects panel regres-<br>819 sion          |
| 816 <a href="#">Pablo-Romero et al. (2019)</a>        | 817 temperature                                                                   | 818 cooling degree days,<br>819 heating degree days,<br>820 squared cooling degree<br>821 days, squared heating<br>822 degree days                      | 823 fixed effects panel regres-<br>824 sion          |
| 817 <a href="#">Paglialunga et al. (2022)</a>         | 818 temperature,<br>819 precipitation                                             | 820 average monthly tem-<br>821 perature, heatwave<br>822 dummy, SPI precipi-<br>823 tation anomalies,<br>824 increasing precipitation<br>825 anomalies | 826 fixed effects panel regres-<br>827 sion          |
| 823 <a href="#">Peillex et al. (2021)</a>             | 824 temperature                                                                   | 825 hot days, temperature<br>826 bins                                                                                                                   | 827 OLS regression                                   |

825  
826  
827  
828

| <b>Table S5:</b> Weather variables and methods used in the reviewed studies (continued) |                                       |                                                                                                                                                           |                                                   | 829 |
|-----------------------------------------------------------------------------------------|---------------------------------------|-----------------------------------------------------------------------------------------------------------------------------------------------------------|---------------------------------------------------|-----|
| Publication                                                                             | Weather studied                       | Weather measure                                                                                                                                           | Methodology                                       | 830 |
| Quante et al. (2024)                                                                    | temperature, precipitation            | daily temperature anomaly, daily rainfall exceeding 99th percentile, wet day, rainfall anomaly, daily extreme temperature threshold                       | Acclimate                                         | 831 |
| Rubio-Cabaez (2024)                                                                     | temperature                           | daily average temperature, extremely hot day, extremely cold day, number of extreme temperature days, cold season, hot season                             | fixed effects difference-in-differences           | 832 |
| Russ (2020)                                                                             | runoff, temperature, precipitation    | runoff shocks, annual temperature shocks, annual precipitation shocks                                                                                     | fixed effects panel regression                    | 833 |
| Saucy et al. (2021)                                                                     | temperature, precipitation            | daily outdoor temperature, daily maximum, minimum, mean temperature, daily mean precipitation                                                             | distributed lag non-linear model                  | 834 |
| Schleypen et al. (2022)                                                                 | temperature, precipitation            | mean annual temperature, total annual precipitation, total annual precipitation, temperature shock, warm-spell duration index, maximum annual temperature | non-linear panel regression, spatial Durbin model | 835 |
| Schmitt et al. (2022)                                                                   | soil moisture, extreme weather events | drought, soil moisture, waterlogging, black frost, spring chill, heat                                                                                     | fixed effects panel regression                    | 836 |
| Semenova (2024)                                                                         | -                                     | -                                                                                                                                                         | -                                                 | 837 |
| Sheng et al. (2023)                                                                     | temperature                           | year-on-year temperature growth, temperature volatility                                                                                                   | local projections                                 | 838 |
| Tol (2024)                                                                              | -                                     | -                                                                                                                                                         | -                                                 | 839 |
| Ubilava (2017)                                                                          | sea surface temperature               | Nio index, sea surface temperature anomaly                                                                                                                | vector smooth transition autoregression           | 840 |

875 **Table S5:** Weather variables and methods used in the reviewed studies (continued)  
 876

| 877 Publication                           | 878 Weather studied                      | 879 stud-                                                                                                              | 880 Weather measure                 | 881 Methodology                                                                   |
|-------------------------------------------|------------------------------------------|------------------------------------------------------------------------------------------------------------------------|-------------------------------------|-----------------------------------------------------------------------------------|
| 882 Ubilava and Abdolrahimi (2019)        | 883 sea surface temperature              | 884 surface                                                                                                            | 885 sea surface temperature anomaly | 886 fixed effects panel regression                                                |
| 887 Verschuur et al. (2023)               | 888 temperature, extreme weather events  | 889 -                                                                                                                  | 890 -                               | 891 OLS regression                                                                |
| 892 Vielma et al. (2024)                  | 893 temperature                          | 894 cross-basis function of                                                                                            | 895 temperature                     | 896 quasi-Poisson generalized linear regression, distributed lag non-linear model |
| 897 von Möllendorff and Hirschfeld (2016) | 898 extreme weather events               | 899 extreme weather events                                                                                             | 900 extreme weather events          | 901 fixed effects panel regression                                                |
| 902 Waldinger (2024)                      | 903 temperature, precipitation, droughts | 904 deviations from long-term mean of temperature and precipitation                                                    | 905 -                               | 906 fixed effects panel regression                                                |
| 907 Wasko et al. (2021)                   | 908 precipitation, temperature           | 909 drought                                                                                                            | 910 -                               | 911 linear regression                                                             |
| 912 Zou et al. (2024)                     | 913 temperature, precipitation           | 914 annual average of day-to-day temperature variability, wet days, extreme rainfall days, monthly rainfall deviations | 915 -                               | 916 random effects panel regression                                               |

906  
 907  
 908 **Table S6:** Weather data features and controls used in the reviewed studies  
 909

| 910 Publication           | 911 Weighted | 912 Weather data source                           | 913 Controls used                                    |
|---------------------------|--------------|---------------------------------------------------|------------------------------------------------------|
| 914 Achebak et al. (2024) | 915 No       | 916 E-OBS                                         | 917 day of the week, day of the season, year squared |
| 918 Ahmed et al. (2024)   | 919 No       | 920 Visual Crossing Weather                       | day of the week                                      |
| 921 Bastos et al. (2013)  | 922 Yes      | 923 Terrestrial Air Temperature and Precipitation | 924 industry FE, country FE, year FE                 |
| 925 Beirne et al. (2024)  | 926 No       | 927 EM-DAT                                        | 928 -                                                |

| Table S6: Weather data features and controls used in the reviewed studies (continued) |          |                                                                                                     | 921                                                                                                        |     |
|---------------------------------------------------------------------------------------|----------|-----------------------------------------------------------------------------------------------------|------------------------------------------------------------------------------------------------------------|-----|
| Publication                                                                           | Weighted | Weather data source                                                                                 | Controls used                                                                                              | 922 |
|                                                                                       |          |                                                                                                     |                                                                                                            | 923 |
| Berg et al. (2024)                                                                    | No       | Terrestrial Air Temperature and Precipitation, Berkeley Earth Global Daily Land Average Temperature | -                                                                                                          | 924 |
| Bigerna (2018)                                                                        | Yes      | Italian Military Airforce General Office for Meteorology                                            | -                                                                                                          | 925 |
| Bigler and Janzen (2024)                                                              | No       | ERA5                                                                                                | district FE, state-year-month FE, day-of-week FE, holiday FE                                               | 926 |
| Black et al. (2013)                                                                   | -        | -                                                                                                   | -                                                                                                          | 927 |
| Blumenthal and Nyberg (2019)                                                          | No       | State Meteorological Agency                                                                         | -                                                                                                          | 928 |
| Boccard (2018)                                                                        | No       | CATNAT                                                                                              | -                                                                                                          | 929 |
| Cai et al. (2016)                                                                     | Yes      | NASA                                                                                                | country pair FE, origin country-specific linear time trend, destination country-specific linear time trend | 930 |
| Cashin et al. (2017)                                                                  | No       | National and Oceanic Atmospheric Administration                                                     | -                                                                                                          | 931 |
| Cevik and Gwon (2024)                                                                 | No       | World Bank Climate Change Knowledge Portal                                                          | -                                                                                                          | 932 |
| Chabot and Bertrand (2023)                                                            | Yes      | State Meteorological Agency                                                                         | -                                                                                                          | 933 |
| Chambru (2020)                                                                        | No       | European Seasonal Temperature and Precipitation Reconstruction                                      | province FE, time FE                                                                                       | 934 |
| Chen et al. (2023)                                                                    | No       | CMIP6, TerraClimate                                                                                 | -                                                                                                          | 935 |
| Chen et al. (2021)                                                                    | No       | International Disasters Database                                                                    | cross-specific FE                                                                                          | 936 |
| Ciccarelli et al. (2024)                                                              | Yes      | ERA5                                                                                                | seasonal dummy variables                                                                                   | 937 |
| Colelli et al. (2023)                                                                 | Yes      | ERA5                                                                                                | time FE, region FE, day-of-year FE, weekly FE, monthly FE, yearly FE                                       | 938 |
|                                                                                       |          |                                                                                                     |                                                                                                            | 939 |
|                                                                                       |          |                                                                                                     |                                                                                                            | 940 |
|                                                                                       |          |                                                                                                     |                                                                                                            | 941 |
|                                                                                       |          |                                                                                                     |                                                                                                            | 942 |
|                                                                                       |          |                                                                                                     |                                                                                                            | 943 |
|                                                                                       |          |                                                                                                     |                                                                                                            | 944 |
|                                                                                       |          |                                                                                                     |                                                                                                            | 945 |
|                                                                                       |          |                                                                                                     |                                                                                                            | 946 |
|                                                                                       |          |                                                                                                     |                                                                                                            | 947 |
|                                                                                       |          |                                                                                                     |                                                                                                            | 948 |
|                                                                                       |          |                                                                                                     |                                                                                                            | 949 |
|                                                                                       |          |                                                                                                     |                                                                                                            | 950 |
|                                                                                       |          |                                                                                                     |                                                                                                            | 951 |
|                                                                                       |          |                                                                                                     |                                                                                                            | 952 |
|                                                                                       |          |                                                                                                     |                                                                                                            | 953 |
|                                                                                       |          |                                                                                                     |                                                                                                            | 954 |
|                                                                                       |          |                                                                                                     |                                                                                                            | 955 |
|                                                                                       |          |                                                                                                     |                                                                                                            | 956 |
|                                                                                       |          |                                                                                                     |                                                                                                            | 957 |
|                                                                                       |          |                                                                                                     |                                                                                                            | 958 |
|                                                                                       |          |                                                                                                     |                                                                                                            | 959 |
|                                                                                       |          |                                                                                                     |                                                                                                            | 960 |
|                                                                                       |          |                                                                                                     |                                                                                                            | 961 |
|                                                                                       |          |                                                                                                     |                                                                                                            | 962 |
|                                                                                       |          |                                                                                                     |                                                                                                            | 963 |
|                                                                                       |          |                                                                                                     |                                                                                                            | 964 |
|                                                                                       |          |                                                                                                     |                                                                                                            | 965 |
|                                                                                       |          |                                                                                                     |                                                                                                            | 966 |

967 **Table S6:** Weather data features and controls used in the reviewed studies (continued)  
968

| 969  | Publication                                  | Weighted | Weather data source                                                       | Controls used                                           |
|------|----------------------------------------------|----------|---------------------------------------------------------------------------|---------------------------------------------------------|
| 970  | <a href="#">Crispino and</a>                 | No       | E-OBS, European                                                           | Severe region FE, week-year FE                          |
| 971  | <a href="#">Loberto (2024)</a>               |          | Weather Dataset                                                           |                                                         |
| 972  | <a href="#">Díaz et al. (2015)</a>           | No       | State Meteorological                                                      | -                                                       |
| 973  |                                              |          | Agency                                                                    |                                                         |
| 974  | <a href="#">Donadelli et al. (2021)</a>      | No       | World Bank Climate Change Knowledge Portal, Climatic Research Unit        | country FE                                              |
| 975  |                                              |          |                                                                           |                                                         |
| 976  | <a href="#">Donadelli et al. (2022)</a>      | No       | World Bank Climate Change Knowledge Portal                                | country FE                                              |
| 977  |                                              |          |                                                                           |                                                         |
| 978  | <a href="#">Drescher and</a>                 | No       | State Meteorological                                                      | zip-code-by-week FE,                                    |
| 979  | <a href="#">Janzen (2025)</a>                |          | Agency                                                                    | region-by-year-month FE,                                |
| 980  |                                              |          |                                                                           | day of the week, holiday                                |
| 981  | <a href="#">Ellena et al. (2022)</a>         | No       | UERRA Regional Reanalysis Dataset                                         | day of week                                             |
| 982  |                                              |          |                                                                           |                                                         |
| 983  | <a href="#">Falk (2013)</a>                  | No       | Central Institute for Meteorology and Geodynamics (ZAMG Austria)          | -                                                       |
| 984  |                                              |          |                                                                           |                                                         |
| 985  | <a href="#">Felbermayr et al. (2022)</a>     | No       | Climatic Research Unit                                                    | cell FE                                                 |
| 986  |                                              |          |                                                                           |                                                         |
| 987  | <a href="#">Gössling et al. (2023)</a>       | -        | -                                                                         | -                                                       |
| 988  |                                              |          |                                                                           |                                                         |
| 989  | <a href="#">Gupta et al. (2023)</a>          | No       | National and Atmospheric Administration                                   | -                                                       |
| 990  |                                              |          |                                                                           |                                                         |
| 991  | <a href="#">Hoffmann et al. (2022)</a>       | No       | ERA5                                                                      | region FE, time-period FE, season FE                    |
| 992  |                                              |          |                                                                           |                                                         |
| 993  | <a href="#">Huang and Hong (2024)</a>        | Yes      | Climatic Research Unit, CMIP6, World Bank Climate Change Knowledge Portal | country FE, country-specific time trends, year squared  |
| 994  |                                              |          |                                                                           |                                                         |
| 995  | <a href="#">Jennings and</a>                 | No       | State Meteorological                                                      | province-level FE,                                      |
| 996  | <a href="#">Gray (2015)</a>                  |          | Agency                                                                    | quadratic time trend                                    |
| 997  | <a href="#">Kahn et al. (2021)</a>           | Yes      | Terrestrial Air Temperature and Precipitation                             | country FE, time FE                                     |
| 998  |                                              |          |                                                                           |                                                         |
| 999  | <a href="#">Karlsson and Ziebarth (2018)</a> | Yes      | State Meteorological Agency                                               | country FE, week FE, year-month FE, splines of the date |
| 1000 |                                              |          |                                                                           |                                                         |
| 1001 | <a href="#">Khan et al. (2017)</a>           | No       | ERA-Interim, MacPDM                                                       | country-basin FE, year FE                               |
| 1002 |                                              |          |                                                                           |                                                         |
| 1003 |                                              |          |                                                                           |                                                         |
| 1004 |                                              |          |                                                                           |                                                         |
| 1005 |                                              |          |                                                                           |                                                         |
| 1006 |                                              |          |                                                                           |                                                         |
| 1007 |                                              |          |                                                                           |                                                         |
| 1008 |                                              |          |                                                                           |                                                         |
| 1009 |                                              |          |                                                                           |                                                         |
| 1010 |                                              |          |                                                                           |                                                         |
| 1011 |                                              |          |                                                                           |                                                         |
| 1012 |                                              |          |                                                                           |                                                         |

| Table S6: Weather data features and controls used in the reviewed studies (continued) |                              |                                               |                                                               |                                      |  | 1013 |
|---------------------------------------------------------------------------------------|------------------------------|-----------------------------------------------|---------------------------------------------------------------|--------------------------------------|--|------|
| Publication                                                                           | Weighted Weather data source |                                               | Controls used                                                 |                                      |  | 1014 |
| Kotz et al. (2021)                                                                    | No                           | ERA5                                          | region FE, year FE, time trend                                |                                      |  | 1015 |
| Kotz et al. (2024)                                                                    | Yes                          | ERA5                                          | country FE, time FE, country-month FE                         |                                      |  | 1016 |
| Letta and Tol (2019)                                                                  | Yes                          | Terrestrial Air Temperature and Precipitation | country FE, region-year FE                                    |                                      |  | 1017 |
| Linsenmeier (2023)                                                                    | No                           | ERA5                                          | country FE, country-pair border FE                            |                                      |  | 1018 |
| Lis and Nickel (2010)                                                                 | No                           | EM-DAT                                        | time FE, country FE                                           |                                      |  | 1019 |
| Lpez-Bueno et al. (2019)                                                              | No                           | State Agency                                  | Meteorological                                                | seasonality, month, year, time trend |  | 1020 |
| Lpez-Bueno et al. (2020b)                                                             | No                           | State Agency                                  | Meteorological                                                | -                                    |  | 1021 |
| Lpez-Bueno et al. (2021)                                                              | No                           | State Agency                                  | Meteorological                                                | time trend, month-year, seasonality  |  | 1022 |
| Lpez-Bueno et al. (2020a)                                                             | No                           | State Agency                                  | Meteorological                                                | -                                    |  | 1023 |
| Lpez-Bueno et al. (2022)                                                              | No                           | State Agency                                  | Meteorological                                                | seasonality                          |  | 1024 |
| Lucidi et al. (2024)                                                                  | Yes                          | -                                             | country FE, country time-varying trend                        |                                      |  | 1025 |
| Mannell et al. (2024)                                                                 | No                           | EM-DAT                                        | -                                                             |                                      |  | 1026 |
| Marinaccio et al. (2019)                                                              | No                           | NASA                                          | municipality FE, year FE, month, day of the week, holiday     |                                      |  | 1027 |
| Martnez-Solanas and Basagaa (2019)                                                    | No                           | European Climate Assessment Dataset           | -                                                             |                                      |  | 1028 |
| Middelanis et al. (2023)                                                              | No                           | CMIP5                                         | -                                                             |                                      |  | 1029 |
| Miller et al. (2021)                                                                  | Yes                          | Climate Prediction Center                     | country FE, year FE, linear and quadratic country time trends |                                      |  | 1030 |
| Mosquera-Lpez et al. (2024)                                                           | No                           | Bloomberg                                     | -                                                             |                                      |  | 1031 |
| Mukherjee and Ouattara (2021)                                                         | Yes                          | UN Climate Database                           | country FE, year FE                                           |                                      |  | 1032 |

1059 **Table S6:** Weather data features and controls used in the reviewed studies (continued)  
 1060

| 1061 | Publication                       | Weighted | Weather data source                                                            |                         | Controls used                                                  |
|------|-----------------------------------|----------|--------------------------------------------------------------------------------|-------------------------|----------------------------------------------------------------|
| 1062 | Mumtaz and Theophilopoulou (2024) | No       | Climatic Research Unit                                                         |                         | country FE, region FE, time FE                                 |
| 1063 | Otrachshenko and Popova (2022)    | Yes      | State Agency                                                                   | Meteorological          | regional FE, time FE, time trend, region-specific linear trend |
| 1064 | Otrachshenko et al. (2021)        | Yes      | State Agency                                                                   | Meteorological          | regional FE, time FE, time trend, region-specific linear trend |
| 1065 | Otrachshenko et al. (2017)        | Yes      | State Agency                                                                   | Meteorological          | regional FE, time FE, time trend, region-specific linear trend |
| 1066 | Pablo-Romero et al. (2019)        | No       | State Agency                                                                   | Meteorological          | province FE, time FE                                           |
| 1067 | Paglalunga et al. (2022)          | No       | Climatic Research Unit                                                         |                         | country FE, time FE                                            |
| 1068 | Peillex et al. (2021)             | No       | Infoclimat                                                                     |                         | month, day of the week, year                                   |
| 1069 | Quante et al. (2024)              | Yes      | CMIP6                                                                          |                         | -                                                              |
| 1070 | Rubio-Cabaez (2024)               | Yes      | State Agency                                                                   | Meteorological          | municipality FE, time FE                                       |
| 1071 | Russ (2020)                       | No       | Global Water Availability Model, Terrestrial Air Temperature and Precipitation |                         | grid FE, year FE, country time trends                          |
| 1072 | Saucy et al. (2021)               | Yes      | State Agency                                                                   | Meteorological          | country FE                                                     |
| 1073 | Schleypen et al. (2022)           | Yes      | Global Land Assimilation System                                                |                         | region FE, time FE                                             |
| 1074 | Schmitt et al. (2022)             | No       | State Agency                                                                   | Meteorological          | farm-level FE, year FE                                         |
| 1075 | Semenova (2024)                   | -        | -                                                                              | -                       | -                                                              |
| 1076 | Sheng et al. (2023)               | No       | State Agency                                                                   | Meteorological          | -                                                              |
| 1077 | Tol (2024)                        | -        | -                                                                              | -                       | -                                                              |
| 1078 | Ubilava (2017)                    | No       | National and Administration                                                    | Oceanic and Atmospheric | -                                                              |

1079  
1080  
1081  
1082  
1083  
1084  
1085  
1086  
1087  
1088  
1089  
1090  
1091  
1092  
1093  
1094  
1095  
1096  
1097  
1098  
1099  
1100  
1101  
1102  
1103  
1104

| Table S6: Weather data features and controls used in the reviewed studies (continued) |          |                                                 |                                                                                          |                           |           |  | 1105 |
|---------------------------------------------------------------------------------------|----------|-------------------------------------------------|------------------------------------------------------------------------------------------|---------------------------|-----------|--|------|
| Publication                                                                           | Weighted | Weather data source                             | Controls used                                                                            |                           |           |  | 1106 |
| Ubilava and Abdolrahimi (2019)                                                        | No       | National and Administration                     | Oceanic and Atmospheric                                                                  | country FE, country trend | quadratic |  | 1107 |
| Verschuur et al. (2023)                                                               | No       | -                                               | -                                                                                        | -                         | -         |  | 1108 |
| Vielma et al. (2024)                                                                  | Yes      | E-OBS (European Climate Assessment and Dataset) | smooth functions of time, day of the week, holidays, Easter, Christmas, August, 11 March |                           |           |  | 1109 |
| von Möllendorff and Hirschfeld (2016)                                                 | No       | -                                               | -                                                                                        | individual FE, time FE    |           |  | 1110 |
| Waldinger (2024)                                                                      | No       | -                                               | -                                                                                        | region FE                 |           |  | 1111 |
| Wasko et al. (2021)                                                                   | No       | Sigma                                           | -                                                                                        | -                         |           |  | 1112 |
| Zou et al. (2024)                                                                     | No       | 20CRv3-W5E5                                     | -                                                                                        | region RE, time RE        |           |  | 1113 |
|                                                                                       |          |                                                 |                                                                                          |                           |           |  | 1114 |
|                                                                                       |          |                                                 |                                                                                          |                           |           |  | 1115 |
|                                                                                       |          |                                                 |                                                                                          |                           |           |  | 1116 |
|                                                                                       |          |                                                 |                                                                                          |                           |           |  | 1117 |
|                                                                                       |          |                                                 |                                                                                          |                           |           |  | 1118 |
|                                                                                       |          |                                                 |                                                                                          |                           |           |  | 1119 |
|                                                                                       |          |                                                 |                                                                                          |                           |           |  | 1120 |
|                                                                                       |          |                                                 |                                                                                          |                           |           |  | 1121 |
|                                                                                       |          |                                                 |                                                                                          |                           |           |  | 1122 |
|                                                                                       |          |                                                 |                                                                                          |                           |           |  | 1123 |
|                                                                                       |          |                                                 |                                                                                          |                           |           |  | 1124 |
|                                                                                       |          |                                                 |                                                                                          |                           |           |  | 1125 |
|                                                                                       |          |                                                 |                                                                                          |                           |           |  | 1126 |
|                                                                                       |          |                                                 |                                                                                          |                           |           |  | 1127 |
|                                                                                       |          |                                                 |                                                                                          |                           |           |  | 1128 |
|                                                                                       |          |                                                 |                                                                                          |                           |           |  | 1129 |
|                                                                                       |          |                                                 |                                                                                          |                           |           |  | 1130 |
|                                                                                       |          |                                                 |                                                                                          |                           |           |  | 1131 |
|                                                                                       |          |                                                 |                                                                                          |                           |           |  | 1132 |
|                                                                                       |          |                                                 |                                                                                          |                           |           |  | 1133 |
|                                                                                       |          |                                                 |                                                                                          |                           |           |  | 1134 |
|                                                                                       |          |                                                 |                                                                                          |                           |           |  | 1135 |
|                                                                                       |          |                                                 |                                                                                          |                           |           |  | 1136 |
|                                                                                       |          |                                                 |                                                                                          |                           |           |  | 1137 |
|                                                                                       |          |                                                 |                                                                                          |                           |           |  | 1138 |
|                                                                                       |          |                                                 |                                                                                          |                           |           |  | 1139 |
|                                                                                       |          |                                                 |                                                                                          |                           |           |  | 1140 |
|                                                                                       |          |                                                 |                                                                                          |                           |           |  | 1141 |
|                                                                                       |          |                                                 |                                                                                          |                           |           |  | 1142 |
|                                                                                       |          |                                                 |                                                                                          |                           |           |  | 1143 |
|                                                                                       |          |                                                 |                                                                                          |                           |           |  | 1144 |
|                                                                                       |          |                                                 |                                                                                          |                           |           |  | 1145 |
|                                                                                       |          |                                                 |                                                                                          |                           |           |  | 1146 |
|                                                                                       |          |                                                 |                                                                                          |                           |           |  | 1147 |
|                                                                                       |          |                                                 |                                                                                          |                           |           |  | 1148 |
|                                                                                       |          |                                                 |                                                                                          |                           |           |  | 1149 |
|                                                                                       |          |                                                 |                                                                                          |                           |           |  | 1150 |

1151 **Table S7:** Publications broken down by use of population weight for aggregation of  
 1152 weather data  
 1153

| 1154 |                     | Publications                                          | NP |
|------|---------------------|-------------------------------------------------------|----|
| 1155 | Do not use          | Achebak et al. (2024), Ahmed et al. (2024), Beirne    | 51 |
| 1156 | population-weighted | et al. (2024), Berg et al. (2024), Bigler and Janzen  |    |
| 1157 | data                | (2024), Blumenthal and Nyberg (2019), Boccard         |    |
| 1158 |                     | (2018), Cashin et al. (2017), Cevik and Gwon          |    |
| 1159 |                     | (2024), Chambru (2020), Chen et al. (2023), Chen      |    |
| 1160 |                     | et al. (2021), Crispino and Loberto (2024), Díaz      |    |
| 1161 |                     | et al. (2015), Donadelli et al. (2021), Donadelli     |    |
| 1162 |                     | et al. (2022), Drescher and Janzen (2025), Ellena     |    |
| 1163 |                     | et al. (2022), Falk (2013), Felbermayr et al. (2022), |    |
| 1164 |                     | Gupta et al. (2023), Hoffmann et al. (2022), Jen-     |    |
| 1165 |                     | nings and Gray (2015), Khan et al. (2017), Kotz       |    |
| 1166 |                     | et al. (2021), Linsenmeier (2023), Lis and Nickel     |    |
| 1167 |                     | (2010), Lpez-Bueno et al. (2019), Lpez-Bueno          |    |
| 1168 |                     | et al. (2020b), Lpez-Bueno et al. (2021), Lpez-       |    |
| 1169 |                     | Bueno et al. (2020a), Lpez-Bueno et al. (2022),       |    |
| 1170 |                     | Mannell et al. (2024), Marinaccio et al. (2019),      |    |
| 1171 |                     | Martnez-Solanas and Basagaa (2019), Middelanis        |    |
| 1172 |                     | et al. (2023), Mosquera-Lpez et al. (2024), Mum-      |    |
| 1173 |                     | taz and Theophilopoulou (2024), Pablo-Romero          |    |
| 1174 |                     | et al. (2019), Paglialunga et al. (2022), Peillex     |    |
| 1175 |                     | et al. (2021), Russ (2020), Schmitt et al. (2022),    |    |
| 1176 |                     | Sheng et al. (2023), Ubilava (2017), Ubilava          |    |
| 1177 |                     | and Abdolrahimi (2019), Verschuur et al. (2023),      |    |
| 1178 |                     | von Möllendorff and Hirschfeld (2016), Waldinger      |    |
| 1179 |                     | (2024), Wasko et al. (2021), Zou et al. (2024)        |    |
| 1180 | Use population-     | Bastos et al. (2013), Bigerna (2018), Cai et al.      | 22 |
| 1181 | weighted            | (2016), Chabot and Bertrand (2023), Ciccarelli        |    |
| 1182 | data                | et al. (2024), Colelli et al. (2023), Huang and Hong  |    |
| 1183 |                     | (2024), Kahn et al. (2021), Karlsson and Ziebarth     |    |
| 1184 |                     | (2018), Kotz et al. (2024), Letta and Tol (2019),     |    |
| 1185 |                     | Lucidi et al. (2024), Miller et al. (2021), Mukher-   |    |
| 1186 |                     | jee and Ouattara (2021), Otrachshenko and Popova      |    |
| 1187 |                     | (2022), Otrachshenko et al. (2021), Otrachshenko      |    |
| 1188 |                     | et al. (2017), Quante et al. (2024), Rubio-Cabaez     |    |
| 1189 |                     | (2024), Saucy et al. (2021), Schleypen et al. (2022), |    |
| 1190 |                     | Vielma et al. (2024)                                  |    |
| 1191 |                     |                                                       |    |

1192  
 1193 Note: NP refers to Number of Publications.  
 1194

1195  
 1196

## References

- Achebak H, Rey G, Chen Zy, et al (2024) Heat Exposure and Cause-Specific Hospital Admissions in Spain: A Nationwide Cross-Sectional Study. *Environmental Health Perspectives* 132(5):057009. <https://doi.org/10.1289/EHP13254>, URL <https://ehp.niehs.nih.gov/doi/10.1289/EHP13254>, publisher: Environmental Health Perspectives
- Ahmed R, Chen XH, Hoang YH, et al (2024) Climate change effects and their implications for the financial markets: Evidence from the United Kingdom. *Journal of Environmental Management* 366:121782. <https://doi.org/10.1016/j.jenvman.2024.121782>, URL <https://www.sciencedirect.com/science/article/pii/S0301479724017687>
- Bastos P, Straume OR, Urrego JA (2013) Rain, agriculture, and tariffs. *Journal of International Economics* 90(2):364–377. <https://doi.org/10.1016/j.jinteco.2013.03.001>, URL <https://www.sciencedirect.com/science/article/pii/S0022199613000287>
- Beirne J, Dafermos Y, Kriwoluzky A, et al (2024) Weather-related disasters and inflation in the euro area. *Journal of Banking & Finance* 169:107298. <https://doi.org/10.1016/j.jbankfin.2024.107298>, URL <https://www.sciencedirect.com/science/article/pii/S0378426624002127>
- Berg KA, Curtis CC, Mark NC (2024) GDP and temperature: Evidence on cross-country response heterogeneity. *European Economic Review* 169:104833. <https://doi.org/10.1016/j.euroecorev.2024.104833>, URL <https://www.sciencedirect.com/science/article/pii/S0014292124001624>
- Bigerna S (2018) Estimating temperature effects on the Italian electricity market. *Energy Policy* 118:257–269. <https://doi.org/10.1016/j.enpol.2018.03.068>, URL <https://www.sciencedirect.com/science/article/pii/S0301421518302015>
- Bigler P, Janzen B (2024) Too hot to sleep. *Journal of Environmental Economics and Management* 128:103063. <https://doi.org/10.1016/j.jeem.2024.103063>, URL <https://www.sciencedirect.com/science/article/pii/S0095069624001372>
- Black R, Arnell NW, Adger WN, et al (2013) Migration, immobility and displacement outcomes following extreme events. *Environmental Science & Policy* 27:S32–S43. <https://doi.org/10.1016/j.envsci.2012.09.001>, URL <https://www.sciencedirect.com/science/article/pii/S1462901112001475>
- Blumenthal B, Nyberg L (2019) The impact of intense rainfall on insurance losses in two Swedish cities. *Journal of Flood Risk Management* 12(S2):e12504. <https://doi.org/10.1111/jfr3.12504>, URL <https://onlinelibrary.wiley.com/doi/abs/10.1111/jfr3.12504>, eprint: <https://onlinelibrary.wiley.com/doi/pdf/10.1111/jfr3.12504>

- 1243 Boccard N (2018) Natural disasters over France a 35 years assessment. *Weather*  
1244 and *Climate Extremes* 22:59–71. <https://doi.org/10.1016/j.wace.2018.07.005>, URL  
1245 <https://www.sciencedirect.com/science/article/pii/S2212094718300495>  
1246
- 1247 Cai R, Feng S, Oppenheimer M, et al (2016) Climate variability and international  
1248 migration: The importance of the agricultural linkage. *Journal of Environmental*  
1249 *Economics and Management* 79:135–151. [https://doi.org/10.1016/j.jeem.2016.06.](https://doi.org/10.1016/j.jeem.2016.06.005)  
1250 [005](https://doi.org/10.1016/j.jeem.2016.06.005), URL <https://www.sciencedirect.com/science/article/pii/S0095069616300882>  
1251
- 1252 Cashin P, Mohaddes K, Raissi M (2017) Fair weather or foul? The macroeconomic  
1253 effects of El Nio. *Journal of International Economics* 106:37–54. [https://doi.org/](https://doi.org/10.1016/j.jinteco.2017.01.010)  
1254 [10.1016/j.jinteco.2017.01.010](https://doi.org/10.1016/j.jinteco.2017.01.010), URL [https://www.sciencedirect.com/science/article/](https://www.sciencedirect.com/science/article/pii/S0022199617300120)  
1255 [pii/S0022199617300120](https://www.sciencedirect.com/science/article/pii/S0022199617300120)  
1256
- 1257 Cevik S, Gwon G (2024) This is going to hurt: Weather anomalies, supply  
1258 chain pressures and inflation. *International Economics* 180:100560. [https://doi.org/](https://doi.org/10.1016/j.inteco.2024.100560)  
1259 [10.1016/j.inteco.2024.100560](https://doi.org/10.1016/j.inteco.2024.100560), URL [https://www.sciencedirect.com/science/article/](https://www.sciencedirect.com/science/article/pii/S2110701724000830)  
1260 [pii/S2110701724000830](https://www.sciencedirect.com/science/article/pii/S2110701724000830)  
1261
- 1262 Chabot M, Bertrand JL (2023) Climate risks and financial stability: Evidence from  
1263 the European financial system. *Journal of Financial Stability* 69:101190. [https://doi.org/](https://doi.org/10.1016/j.jfs.2023.101190)  
1264 [10.1016/j.jfs.2023.101190](https://doi.org/10.1016/j.jfs.2023.101190), URL [https://www.sciencedirect.com/science/](https://www.sciencedirect.com/science/article/pii/S1572308923000906)  
1265 [article/pii/S1572308923000906](https://www.sciencedirect.com/science/article/pii/S1572308923000906)  
1266
- 1266 Chambru C (2020) Weather shocks, poverty and crime in 18th-century Savoy. *Explo-*  
1267 *rations in Economic History* 78:101353. <https://doi.org/10.1016/j.eeh.2020.101353>,  
1268 URL <https://www.sciencedirect.com/science/article/pii/S0014498320300486>  
1269
- 1270 Chen J, Jiao Z, Liang Z, et al (2023) Association between temperature variability  
1271 and global meningitis incidence. *Environment International* 171:107649. [https://doi.](https://doi.org/10.1016/j.envint.2022.107649)  
1272 [org/10.1016/j.envint.2022.107649](https://doi.org/10.1016/j.envint.2022.107649), URL [https://www.sciencedirect.com/science/](https://www.sciencedirect.com/science/article/pii/S0160412022005761)  
1273 [article/pii/S0160412022005761](https://www.sciencedirect.com/science/article/pii/S0160412022005761)  
1274
- 1275 Chen X, Fu Q, Chang CP (2021) What are the shocks of climate change on clean  
1276 energy investment: A diversified exploration. *Energy Economics* 95:105136. [https://](https://doi.org/10.1016/j.eneco.2021.105136)  
1277 [doi.org/10.1016/j.eneco.2021.105136](https://doi.org/10.1016/j.eneco.2021.105136), URL [https://www.sciencedirect.com/science/](https://www.sciencedirect.com/science/article/pii/S0140988321000414)  
1278 [article/pii/S0140988321000414](https://www.sciencedirect.com/science/article/pii/S0140988321000414)  
1279
- 1280 Ciccarelli M, Kuik F, Martnez Hernandez C (2024) The asymmetric effects of tem-  
1281 perature shocks on inflation in the largest euro area countries. *European Economic*  
1282 *Review* 168:104805. <https://doi.org/10.1016/j.eurocorev.2024.104805>, URL [https://](https://www.sciencedirect.com/science/article/pii/S001429212400134X)  
1283 [www.sciencedirect.com/science/article/pii/S001429212400134X](https://www.sciencedirect.com/science/article/pii/S001429212400134X)  
1284
- 1285 Colelli FP, Wing IS, De Cian E (2023) Intensive and extensive margins of the  
1286 peak load: Measuring adaptation with mixed frequency panel data. *Energy*  
1287 *Economics* 126:106923. <https://doi.org/10.1016/j.eneco.2023.106923>, URL [https://](https://www.sciencedirect.com/science/article/pii/S0140988323004218)  
1288 [www.sciencedirect.com/science/article/pii/S0140988323004218](https://www.sciencedirect.com/science/article/pii/S0140988323004218)

|                                                                                                                                                                                                                                                                                                                                                                                                                                                                                                                        |                                              |
|------------------------------------------------------------------------------------------------------------------------------------------------------------------------------------------------------------------------------------------------------------------------------------------------------------------------------------------------------------------------------------------------------------------------------------------------------------------------------------------------------------------------|----------------------------------------------|
| Crispino M, Loberto M (2024) Do people pay attention to climate change? Evidence from Italy. <i>Journal of Economic Behavior &amp; Organization</i> 219:434–449. <a href="https://doi.org/10.1016/j.jebo.2024.01.028">https://doi.org/10.1016/j.jebo.2024.01.028</a> , URL <a href="https://www.sciencedirect.com/science/article/pii/S0167268124000349">https://www.sciencedirect.com/science/article/pii/S0167268124000349</a>                                                                                       | 1289<br>1290<br>1291<br>1292<br>1293         |
| Díaz J, Carmona R, Mirón IJ, et al (2015) Comparison of the effects of extreme temperatures on daily mortality in Madrid (Spain), by age group: The need for a cold wave prevention plan. <i>Environmental Research</i> 143:186–191. <a href="https://doi.org/10.1016/j.envres.2015.10.018">https://doi.org/10.1016/j.envres.2015.10.018</a> , URL <a href="https://www.sciencedirect.com/science/article/pii/S001393511530116X">https://www.sciencedirect.com/science/article/pii/S001393511530116X</a>               | 1294<br>1295<br>1296<br>1297<br>1298<br>1299 |
| Donadelli M, Grning P, Jppner M, et al (2021) Global temperature, R&D expenditure, and growth. <i>Energy Economics</i> 104:105608. <a href="https://doi.org/10.1016/j.eneco.2021.105608">https://doi.org/10.1016/j.eneco.2021.105608</a> , URL <a href="https://www.sciencedirect.com/science/article/pii/S0140988321004758">https://www.sciencedirect.com/science/article/pii/S0140988321004758</a>                                                                                                                   | 1300<br>1301<br>1302<br>1303<br>1304         |
| Donadelli M, Jppner M, Vergalli S (2022) Temperature Variability and the Macroeconomy: A World Tour. <i>Environmental and Resource Economics</i> 83(1):221–259. <a href="https://doi.org/10.1007/s10640-021-00579-5">https://doi.org/10.1007/s10640-021-00579-5</a> , URL <a href="https://doi.org/10.1007/s10640-021-00579-5">https://doi.org/10.1007/s10640-021-00579-5</a>                                                                                                                                          | 1305<br>1306<br>1307<br>1308<br>1309         |
| Drescher K, Janzen B (2025) When weather wounds workers: The impact of temperature on workplace accidents. <i>Journal of Public Economics</i> 241:105258. <a href="https://doi.org/10.1016/j.jpubeco.2024.105258">https://doi.org/10.1016/j.jpubeco.2024.105258</a> , URL <a href="https://www.sciencedirect.com/science/article/pii/S0047272724001944">https://www.sciencedirect.com/science/article/pii/S0047272724001944</a>                                                                                        | 1310<br>1311<br>1312<br>1313<br>1314         |
| Ellena M, Ballester J, Costa G, et al (2022) Evolution of temperature-attributable mortality trends looking at social inequalities: An observational case study of urban maladaptation to cold and heat. <i>Environmental Research</i> 214:114082. <a href="https://doi.org/10.1016/j.envres.2022.114082">https://doi.org/10.1016/j.envres.2022.114082</a> , URL <a href="https://www.sciencedirect.com/science/article/pii/S0013935122014098">https://www.sciencedirect.com/science/article/pii/S0013935122014098</a> | 1315<br>1316<br>1317<br>1318<br>1319         |
| Falk M (2013) Impact of Long-Term Weather on Domestic and Foreign Winter Tourism Demand. <i>International Journal of Tourism Research</i> 15(1):1–17. <a href="https://doi.org/10.1002/jtr.865">https://doi.org/10.1002/jtr.865</a> , URL <a href="https://onlinelibrary.wiley.com/doi/abs/10.1002/jtr.865">https://onlinelibrary.wiley.com/doi/abs/10.1002/jtr.865</a> , eprint: <a href="https://onlinelibrary.wiley.com/doi/pdf/10.1002/jtr.865">https://onlinelibrary.wiley.com/doi/pdf/10.1002/jtr.865</a>        | 1320<br>1321<br>1322<br>1323<br>1324         |
| Felbermayr G, Grschl J, Sanders M, et al (2022) The economic impact of weather anomalies. <i>World Development</i> 151:105745. <a href="https://doi.org/10.1016/j.worlddev.2021.105745">https://doi.org/10.1016/j.worlddev.2021.105745</a> , URL <a href="https://www.sciencedirect.com/science/article/pii/S0305750X21003600">https://www.sciencedirect.com/science/article/pii/S0305750X21003600</a>                                                                                                                 | 1325<br>1326<br>1327<br>1328<br>1329         |
| Gössling S, Neger C, Steiger R, et al (2023) Weather, climate change, and transport: a review. <i>Natural Hazards</i> 118(2):1341–1360. <a href="https://doi.org/10.1007/s11069-023-06054-2">https://doi.org/10.1007/s11069-023-06054-2</a> , URL <a href="https://doi.org/10.1007/s11069-023-06054-2">https://doi.org/10.1007/s11069-023-06054-2</a>                                                                                                                                                                  | 1330<br>1331<br>1332<br>1333<br>1334         |

- 1335 Gupta R, Nel J, Salisu AA, et al (2023) Predictability of economic slowdowns  
1336 in advanced countries over eight centuries: The role of climate risks. *Finance*  
1337 *Research Letters* 54:103795. <https://doi.org/10.1016/j.frl.2023.103795>, URL <https://www.sciencedirect.com/science/article/pii/S154461232300168X>  
1338  
1339
- 1340 Hoffmann R, Muttarak R, Peisker J, et al (2022) Climate change experiences raise envi-  
1341 ronmental concerns and promote Green voting. *Nature Climate Change* 12(2):148–  
1342 155. <https://doi.org/10.1038/s41558-021-01263-8>, URL <https://www.nature.com/articles/s41558-021-01263-8>, publisher: Nature Publishing Group  
1343  
1344
- 1345 Huang K, Hong Q (2024) The impact of global warming on obesity. *Journal of*  
1346 *Population Economics* 37(3):59. <https://doi.org/10.1007/s00148-024-01039-2>, URL  
1347 <https://doi.org/10.1007/s00148-024-01039-2>  
1348
- 1349 Jennings JA, Gray CL (2015) Climate variability and human migration in the Nether-  
1350 lands, 1865-1937. *Population and Environment* 36(3):255–278. <https://doi.org/10.1007/s11111-014-0218-z>, URL <https://doi.org/10.1007/s11111-014-0218-z>  
1351
- 1352 Kahn ME, Mohaddes K, Ng RNC, et al (2021) Long-term macroeconomic effects of  
1353 climate change: A cross-country analysis. *Energy Economics* 104:105624. <https://doi.org/10.1016/j.eneco.2021.105624>, URL <https://www.sciencedirect.com/science/article/pii/S0140988321004898>  
1354  
1355  
1356
- 1357 Karlsson M, Ziebarth NR (2018) Population health effects and health-related  
1358 costs of extreme temperatures: Comprehensive evidence from Germany. *Journal of Environmental Economics and Management* 91:93–117. <https://doi.org/10.1016/j.jeem.2018.06.004>, URL <https://www.sciencedirect.com/science/article/pii/S0095069616304636>  
1359  
1360  
1361  
1362
- 1363 Khan HF, Morzuch BJ, Brown CM (2017) Water and growth: An  
1364 econometric analysis of climate and policy impacts. *Water Resources*  
1365 *Research* 53(6):5124–5136. <https://doi.org/10.1002/2016WR020054>, URL  
1366 <https://onlinelibrary.wiley.com/doi/abs/10.1002/2016WR020054>, eprint:  
1367 <https://agupubs.onlinelibrary.wiley.com/doi/pdf/10.1002/2016WR020054>  
1368
- 1369 Kotz M, Wenz L, Stechemesser A, et al (2021) Day-to-day temperature vari-  
1370 ability reduces economic growth. *Nature Climate Change* 11(4):319–325. <https://doi.org/10.1038/s41558-020-00985-5>, URL <https://www.nature.com/articles/s41558-020-00985-5>, publisher: Nature Publishing Group  
1371  
1372
- 1373 Kotz M, Kuik F, Lis E, et al (2024) Global warming and heat extremes  
1374 to enhance inflationary pressures. *Communications Earth & Environment*  
1375 5(1):116. <https://doi.org/10.1038/s43247-023-01173-x>, URL <https://www.nature.com/articles/s43247-023-01173-x>, publisher: Nature Publishing Group  
1376  
1377
- 1378 Letta M, Tol RSJ (2019) Weather, Climate and Total Factor Productivity.  
1379 *Environmental and Resource Economics* 73(1):283–305. <https://doi.org/10.1007/>  
1380

|                                                                                                                                                                                                                                                                                                                                                                                                                                                                                                                 |      |
|-----------------------------------------------------------------------------------------------------------------------------------------------------------------------------------------------------------------------------------------------------------------------------------------------------------------------------------------------------------------------------------------------------------------------------------------------------------------------------------------------------------------|------|
| s10640-018-0262-8, URL <a href="https://doi.org/10.1007/s10640-018-0262-8">https://doi.org/10.1007/s10640-018-0262-8</a>                                                                                                                                                                                                                                                                                                                                                                                        | 1381 |
|                                                                                                                                                                                                                                                                                                                                                                                                                                                                                                                 | 1382 |
| Linsenmeier M (2023) Temperature variability and long-run economic development. <i>Journal of Environmental Economics and Management</i> 121:102840. <a href="https://doi.org/10.1016/j.jeem.2023.102840">https://doi.org/10.1016/j.jeem.2023.102840</a> , URL <a href="https://www.sciencedirect.com/science/article/pii/S009506962300058X">https://www.sciencedirect.com/science/article/pii/S009506962300058X</a>                                                                                            | 1383 |
|                                                                                                                                                                                                                                                                                                                                                                                                                                                                                                                 | 1384 |
|                                                                                                                                                                                                                                                                                                                                                                                                                                                                                                                 | 1385 |
|                                                                                                                                                                                                                                                                                                                                                                                                                                                                                                                 | 1386 |
|                                                                                                                                                                                                                                                                                                                                                                                                                                                                                                                 | 1387 |
| Lis EM, Nickel C (2010) The impact of extreme weather events on budget balances. <i>International Tax and Public Finance</i> 17(4):378–399. <a href="https://doi.org/10.1007/s10797-010-9144-x">https://doi.org/10.1007/s10797-010-9144-x</a> , URL <a href="https://doi.org/10.1007/s10797-010-9144-x">https://doi.org/10.1007/s10797-010-9144-x</a>                                                                                                                                                           | 1388 |
|                                                                                                                                                                                                                                                                                                                                                                                                                                                                                                                 | 1389 |
|                                                                                                                                                                                                                                                                                                                                                                                                                                                                                                                 | 1390 |
|                                                                                                                                                                                                                                                                                                                                                                                                                                                                                                                 | 1391 |
| Lucidi FS, Pisa MM, Tancioni M (2024) The effects of temperature shocks on energy prices and inflation in the Euro Area. <i>European Economic Review</i> 166:104771. <a href="https://doi.org/10.1016/j.eurocorev.2024.104771">https://doi.org/10.1016/j.eurocorev.2024.104771</a> , URL <a href="https://www.sciencedirect.com/science/article/pii/S0014292124001004">https://www.sciencedirect.com/science/article/pii/S0014292124001004</a>                                                                  | 1392 |
|                                                                                                                                                                                                                                                                                                                                                                                                                                                                                                                 | 1393 |
|                                                                                                                                                                                                                                                                                                                                                                                                                                                                                                                 | 1394 |
|                                                                                                                                                                                                                                                                                                                                                                                                                                                                                                                 | 1395 |
|                                                                                                                                                                                                                                                                                                                                                                                                                                                                                                                 | 1396 |
| Lpez-Bueno JA, Daz J, Linares C (2019) Differences in the impact of heat waves according to urban and peri-urban factors in Madrid. <i>International Journal of Biometeorology</i> 63(3):371–380. <a href="https://doi.org/10.1007/s00484-019-01670-9">https://doi.org/10.1007/s00484-019-01670-9</a> , URL <a href="https://doi.org/10.1007/s00484-019-01670-9">https://doi.org/10.1007/s00484-019-01670-9</a>                                                                                                 | 1397 |
|                                                                                                                                                                                                                                                                                                                                                                                                                                                                                                                 | 1398 |
|                                                                                                                                                                                                                                                                                                                                                                                                                                                                                                                 | 1399 |
|                                                                                                                                                                                                                                                                                                                                                                                                                                                                                                                 | 1400 |
|                                                                                                                                                                                                                                                                                                                                                                                                                                                                                                                 | 1401 |
| Lpez-Bueno JA, Daz J, Snchez-Guevara C, et al (2020a) The impact of heat waves on daily mortality in districts in Madrid: The effect of sociodemographic factors. <i>Environmental Research</i> 190:109993. <a href="https://doi.org/10.1016/j.envres.2020.109993">https://doi.org/10.1016/j.envres.2020.109993</a> , URL <a href="https://www.sciencedirect.com/science/article/pii/S0013935120308902">https://www.sciencedirect.com/science/article/pii/S0013935120308902</a>                                 | 1402 |
|                                                                                                                                                                                                                                                                                                                                                                                                                                                                                                                 | 1403 |
|                                                                                                                                                                                                                                                                                                                                                                                                                                                                                                                 | 1404 |
|                                                                                                                                                                                                                                                                                                                                                                                                                                                                                                                 | 1405 |
|                                                                                                                                                                                                                                                                                                                                                                                                                                                                                                                 | 1406 |
| Lpez-Bueno JA, Linares C, Snchez-Guevara C, et al (2020b) The effect of cold waves on daily mortality in districts in Madrid considering sociodemographic variables. <i>Science of The Total Environment</i> 749:142364. <a href="https://doi.org/10.1016/j.scitotenv.2020.142364">https://doi.org/10.1016/j.scitotenv.2020.142364</a> , URL <a href="https://www.sciencedirect.com/science/article/pii/S0048969720358939">https://www.sciencedirect.com/science/article/pii/S0048969720358939</a>              | 1407 |
|                                                                                                                                                                                                                                                                                                                                                                                                                                                                                                                 | 1408 |
|                                                                                                                                                                                                                                                                                                                                                                                                                                                                                                                 | 1409 |
|                                                                                                                                                                                                                                                                                                                                                                                                                                                                                                                 | 1410 |
|                                                                                                                                                                                                                                                                                                                                                                                                                                                                                                                 | 1411 |
|                                                                                                                                                                                                                                                                                                                                                                                                                                                                                                                 | 1412 |
| Lpez-Bueno JA, Navas-Martn M, Daz J, et al (2021) The effect of cold waves on mortality in urban and rural areas of Madrid. <i>Environmental Sciences Europe</i> 33(1):72. <a href="https://doi.org/10.1186/s12302-021-00512-z">https://doi.org/10.1186/s12302-021-00512-z</a> , URL <a href="https://doi.org/10.1186/s12302-021-00512-z">https://doi.org/10.1186/s12302-021-00512-z</a>                                                                                                                        | 1413 |
|                                                                                                                                                                                                                                                                                                                                                                                                                                                                                                                 | 1414 |
|                                                                                                                                                                                                                                                                                                                                                                                                                                                                                                                 | 1415 |
|                                                                                                                                                                                                                                                                                                                                                                                                                                                                                                                 | 1416 |
|                                                                                                                                                                                                                                                                                                                                                                                                                                                                                                                 | 1417 |
| Lpez-Bueno JA, Navas-Martn MA, Daz J, et al (2022) Population vulnerability to extreme cold days in rural and urban municipalities in ten provinces in Spain. <i>Science of The Total Environment</i> 852:158165. <a href="https://doi.org/10.1016/j.scitotenv.2022.158165">https://doi.org/10.1016/j.scitotenv.2022.158165</a> , URL <a href="https://www.sciencedirect.com/science/article/pii/S0048969722052640">https://www.sciencedirect.com/science/article/pii/S0048969722052640</a>                     | 1418 |
|                                                                                                                                                                                                                                                                                                                                                                                                                                                                                                                 | 1419 |
|                                                                                                                                                                                                                                                                                                                                                                                                                                                                                                                 | 1420 |
|                                                                                                                                                                                                                                                                                                                                                                                                                                                                                                                 | 1421 |
|                                                                                                                                                                                                                                                                                                                                                                                                                                                                                                                 | 1422 |
| Mannell J, Brown LJ, Jordaan E, et al (2024) The impact of environmental shocks due to climate change on intimate partner violence: A structural equation model of data from 156 countries. <i>PLOS Climate</i> 3(10):e0000478. <a href="https://doi.org/10.1371/journal.pclm.0000478">https://doi.org/10.1371/journal.pclm.0000478</a> , URL <a href="https://journals.plos.org/climate/article?id=10.1371/journal.pclm.0000478">https://journals.plos.org/climate/article?id=10.1371/journal.pclm.0000478</a> | 1423 |
|                                                                                                                                                                                                                                                                                                                                                                                                                                                                                                                 | 1424 |
|                                                                                                                                                                                                                                                                                                                                                                                                                                                                                                                 | 1425 |
|                                                                                                                                                                                                                                                                                                                                                                                                                                                                                                                 | 1426 |

1427 [journal.pclm.0000478](#), publisher: Public Library of Science  
1428  
1429 Marinaccio A, Scortichini M, Gariazzo C, et al (2019) Nationwide epidemiological  
1430 study for estimating the effect of extreme outdoor temperature on occupa-  
1431 tional injuries in Italy. *Environment International* 133:105176. [https://doi.org/10.](https://doi.org/10.1016/j.envint.2019.105176)  
1432 [1016/j.envint.2019.105176](https://doi.org/10.1016/j.envint.2019.105176), URL [https://www.sciencedirect.com/science/article/](https://www.sciencedirect.com/science/article/pii/S0160412019318410)  
1433 [pii/S0160412019318410](https://www.sciencedirect.com/science/article/pii/S0160412019318410)  
1434  
1435 Martnez-Solanas , Basagaa X (2019) Temporal changes in temperature-related mor-  
1436 tality in Spain and effect of the implementation of a Heat Health Prevention Plan.  
1437 *Environmental Research* 169:102–113. [https://doi.org/10.1016/j.envres.2018.11.](https://doi.org/10.1016/j.envres.2018.11.006)  
1438 [006](https://doi.org/10.1016/j.envres.2018.11.006), URL <https://www.sciencedirect.com/science/article/pii/S0013935118305759>  
1439  
1440 Middelanis R, Willner SN, Kuhla K, et al (2023) Stressed economies  
1441 respond more strongly to climate extremes. *Environmental Research Letters*  
1442 18(9):094034. <https://doi.org/10.1088/1748-9326/acec5e>, URL [https://doi.org/10.](https://doi.org/10.1088/1748-9326/acec5e)  
1443 [1088/1748-9326/acec5e](https://doi.org/10.1088/1748-9326/acec5e), publisher: IOP Publishing  
1444  
1445 Miller S, Chua K, Coggins J, et al (2021) Heat Waves, Climate Change, and Economic  
1446 Output. *Journal of the European Economic Association* 19(5):2658–2694. <https://doi.org/10.1093/jeea/jvab009>, URL <https://doi.org/10.1093/jeea/jvab009>  
1447  
1448 von Möllendorff C, Hirschfeld J (2016) Measuring impacts of extreme weather events  
1449 using the life satisfaction approach. *Ecological Economics* 121:108–116. [https://doi.](https://doi.org/10.1016/j.ecolecon.2015.11.013)  
1450 [org/10.1016/j.ecolecon.2015.11.013](https://doi.org/10.1016/j.ecolecon.2015.11.013), URL [https://www.sciencedirect.com/science/](https://www.sciencedirect.com/science/article/pii/S0921800915004450)  
1451 [article/pii/S0921800915004450](https://www.sciencedirect.com/science/article/pii/S0921800915004450)  
1452  
1453 Mosquera-Lpez S, Uribe JM, Joaqui-Barandica O (2024) Weather conditions, climate  
1454 change, and the price of electricity. *Energy Economics* 137:107789. [https://doi.org/](https://doi.org/10.1016/j.eneco.2024.107789)  
1455 [10.1016/j.eneco.2024.107789](https://doi.org/10.1016/j.eneco.2024.107789), URL [https://www.sciencedirect.com/science/article/](https://www.sciencedirect.com/science/article/pii/S0140988324004973)  
1456 [pii/S0140988324004973](https://www.sciencedirect.com/science/article/pii/S0140988324004973)  
1457  
1458 Mukherjee K, Ouattara B (2021) Climate and monetary policy: do temperature shocks  
1459 lead to inflationary pressures? *Climatic Change* 167(3):32. [https://doi.org/10.1007/](https://doi.org/10.1007/s10584-021-03149-2)  
1460 [s10584-021-03149-2](https://doi.org/10.1007/s10584-021-03149-2), URL <https://doi.org/10.1007/s10584-021-03149-2>  
1461  
1462 Mumtaz H, Theophilopoulou A (2024) The distributional effects of climate  
1463 change. An empirical analysis. *European Economic Review* 169:104828. <https://doi.org/10.1016/j.eurocorev.2024.104828>, URL [https://www.sciencedirect.com/](https://www.sciencedirect.com/science/article/pii/S0014292124001570)  
1464 [science/article/pii/S0014292124001570](https://www.sciencedirect.com/science/article/pii/S0014292124001570)  
1465  
1466 Otrachshenko V, Popova O (2022) Does Weather Sharpen Income Inequality in Rus-  
1467 sia? *Review of Income and Wealth* 68(S1):S193–S223. [https://doi.org/10.1111/roiw.](https://doi.org/10.1111/roiw.12532)  
1468 [12532](https://doi.org/10.1111/roiw.12532), URL <https://onlinelibrary.wiley.com/doi/abs/10.1111/roiw.12532>, eprint/  
1469 <https://onlinelibrary.wiley.com/doi/pdf/10.1111/roiw.12532>  
1470  
1471  
1472

|                                                                                                                                                                                                                                                                                                                                                                                                                                                                                                                               |                                      |
|-------------------------------------------------------------------------------------------------------------------------------------------------------------------------------------------------------------------------------------------------------------------------------------------------------------------------------------------------------------------------------------------------------------------------------------------------------------------------------------------------------------------------------|--------------------------------------|
| Otrachshenko V, Popova O, Solomin P (2017) Health Consequences of the Russian Weather. <i>Ecological Economics</i> 132:290–306. <a href="https://doi.org/10.1016/j.ecolecon.2016.10.021">https://doi.org/10.1016/j.ecolecon.2016.10.021</a> , URL <a href="https://www.sciencedirect.com/science/article/pii/S0921800916305122">https://www.sciencedirect.com/science/article/pii/S0921800916305122</a>                                                                                                                       | 1473<br>1474<br>1475<br>1476<br>1477 |
| Otrachshenko V, Popova O, Tavares J (2021) Extreme Temperature and Extreme Violence: Evidence from Russia. <i>Economic Inquiry</i> 59(1):243–262. <a href="https://doi.org/10.1111/ecin.12936">https://doi.org/10.1111/ecin.12936</a> , URL <a href="https://onlinelibrary.wiley.com/doi/abs/10.1111/ecin.12936">https://onlinelibrary.wiley.com/doi/abs/10.1111/ecin.12936</a> , eprint: <a href="https://onlinelibrary.wiley.com/doi/pdf/10.1111/ecin.12936">https://onlinelibrary.wiley.com/doi/pdf/10.1111/ecin.12936</a> | 1478<br>1479<br>1480<br>1481<br>1482 |
| Pablo-Romero MdP, Pozo-Barajas R, Sánchez-Rivas J (2019) Tourism and temperature effects on the electricity consumption of the hospitality sector. <i>Journal of Cleaner Production</i> 240:118168. <a href="https://doi.org/10.1016/j.jclepro.2019.118168">https://doi.org/10.1016/j.jclepro.2019.118168</a> , URL <a href="https://www.sciencedirect.com/science/article/pii/S0959652619330380">https://www.sciencedirect.com/science/article/pii/S0959652619330380</a>                                                     | 1483<br>1484<br>1485<br>1486<br>1487 |
| Paglalunga E, Coveri A, Zanfei A (2022) Climate change and within-country inequality: New evidence from a global perspective. <i>World Development</i> 159:106030. <a href="https://doi.org/10.1016/j.worlddev.2022.106030">https://doi.org/10.1016/j.worlddev.2022.106030</a> , URL <a href="https://www.sciencedirect.com/science/article/pii/S0305750X22002200">https://www.sciencedirect.com/science/article/pii/S0305750X22002200</a>                                                                                    | 1488<br>1489<br>1490<br>1491<br>1492 |
| Peillex J, El Ouadghiri I, Gomes M, et al (2021) Extreme heat and stock market activity. <i>Ecological Economics</i> 179:106810. <a href="https://doi.org/10.1016/j.ecolecon.2020.106810">https://doi.org/10.1016/j.ecolecon.2020.106810</a> , URL <a href="https://www.sciencedirect.com/science/article/pii/S092180092030015X">https://www.sciencedirect.com/science/article/pii/S092180092030015X</a>                                                                                                                      | 1493<br>1494<br>1495<br>1496<br>1497 |
| Quante L, Willner SN, Otto C, et al (2024) Global economic impact of weather variability on the rich and the poor. <i>Nature Sustainability</i> 7(11):1419–1428. <a href="https://doi.org/10.1038/s41893-024-01430-7">https://doi.org/10.1038/s41893-024-01430-7</a> , URL <a href="https://www.nature.com/articles/s41893-024-01430-7">https://www.nature.com/articles/s41893-024-01430-7</a> , publisher: Nature Publishing Group                                                                                           | 1498<br>1499<br>1500<br>1501<br>1502 |
| Rubio-Cabaez M (2024) The stratified effect of extreme temperatures on birth weight: the role of energy prices. <i>Population and Environment</i> 46(4):24. <a href="https://doi.org/10.1007/s11111-024-00465-4">https://doi.org/10.1007/s11111-024-00465-4</a> , URL <a href="https://doi.org/10.1007/s11111-024-00465-4">https://doi.org/10.1007/s11111-024-00465-4</a>                                                                                                                                                     | 1503<br>1504<br>1505<br>1506         |
| Russ J (2020) Water runoff and economic activity: The impact of water supply shocks on growth. <i>Journal of Environmental Economics and Management</i> 101:102322. <a href="https://doi.org/10.1016/j.jeem.2020.102322">https://doi.org/10.1016/j.jeem.2020.102322</a> , URL <a href="https://www.sciencedirect.com/science/article/pii/S0095069620300450">https://www.sciencedirect.com/science/article/pii/S0095069620300450</a>                                                                                           | 1507<br>1508<br>1509<br>1510         |
| Saucy A, Ragetti MS, Vienneau D, et al (2021) The role of extreme temperature in cause-specific acute cardiovascular mortality in Switzerland: A case-crossover study. <i>Science of The Total Environment</i> 790:147958. <a href="https://doi.org/10.1016/j.scitotenv.2021.147958">https://doi.org/10.1016/j.scitotenv.2021.147958</a> , URL <a href="https://www.sciencedirect.com/science/article/pii/S0048969721030291">https://www.sciencedirect.com/science/article/pii/S0048969721030291</a>                          | 1511<br>1512<br>1513<br>1514<br>1515 |
| Schleppen JR, Mistry MN, Saeed F, et al (2022) Sharing the burden: quantifying climate change spillovers in the European Union under the Paris Agreement.                                                                                                                                                                                                                                                                                                                                                                     | 1516<br>1517<br>1518                 |

1519 Spatial Economic Analysis 17(1):67–82. <https://doi.org/10.1080/17421772.2021.1904150>, URL <https://doi.org/10.1080/17421772.2021.1904150>, publisher: RSA

1520 Website \_eprint: <https://doi.org/10.1080/17421772.2021.1904150>

1521

1522

1523 Schmitt J, Offermann F, Sder M, et al (2022) Extreme weather events cause

1524 significant crop yield losses at the farm level in German agriculture. Food Pol-

1525 icy 112:102359. <https://doi.org/10.1016/j.foodpol.2022.102359>, URL <https://www.sciencedirect.com/science/article/pii/S0306919222001282>

1526

1527

1528 Semenova A (2024) Rising temperatures and rising prices: the inflationary impacts

1529 of climate change and the need for degrowth-based solutions to the ecological cri-

1530 sis. Globalizations 21(1):103–120. <https://doi.org/10.1080/14747731.2023.2222482>,

1531 URL <https://doi.org/10.1080/14747731.2023.2222482>, publisher: Routledge \_eprint:

1532 <https://doi.org/10.1080/14747731.2023.2222482>

1533

1534 Sheng X, Chisadza C, Gupta R, et al (2023) Climate shocks and wealth inequal-

1535 ity in the UK: evidence from monthly data. Environmental Science and Pollution

1536 Research 30(31):77771–77783. <https://doi.org/10.1007/s11356-023-27342-1>, URL

1537 <https://doi.org/10.1007/s11356-023-27342-1>

1538

1539 Tol RSJ (2024) A meta-analysis of the total economic impact of climate change.

1540 Energy Policy 185:113922. <https://doi.org/10.1016/j.enpol.2023.113922>, URL <https://www.sciencedirect.com/science/article/pii/S0301421523005074>

1541

1542 Ubilava D (2017) The ENSO Effect and Asymmetries in Wheat Price Dynamics.

1543 World Development 96:490–502. <https://doi.org/10.1016/j.worlddev.2017.03.031>,

1544 URL <https://www.sciencedirect.com/science/article/pii/S0305750X15310172>

1545

1546 Ubilava D, Abdolrahimi M (2019) The El Nio impact on maize yields is ampli-

1547 fied in lower income teleconnected countries. Environmental Research Letters

1548 14(5):054008. <https://doi.org/10.1088/1748-9326/ab0cd0>, URL <https://doi.org/10.1088/1748-9326/ab0cd0>, publisher: IOP Publishing

1549

1550

1551 Verschuur J, Koks EE, Hall JW (2023) Systemic risks from climate-related disrup-

1552 tions at ports. Nature Climate Change 13(8):804–806. <https://doi.org/10.1038/s41558-023-01754-w>, URL <https://www.nature.com/articles/s41558-023-01754-w>,

1553 publisher: Nature Publishing Group

1554

1555

1556 Vielma C, Achebak H, Quijal-Zamorano M, et al (2024) Association between tem-

1557 perature and occupational injuries in Spain: The role of contextual factors in

1558 workers’ adaptation. Environment International 192:109006. <https://doi.org/10.1016/j.envint.2024.109006>, URL <https://www.sciencedirect.com/science/article/pii/S0160412024005920>

1559

1560

1561 Waldinger M (2024) "Let them eat cake": drought, peasant uprisings, and demand

1562 for institutional change in the French Revolution. Journal of Economic Growth

1563 29(1):41–77. <https://doi.org/10.1007/s10887-023-09230-y>, URL <https://doi.org/10.1007/s10887-023-09230-y>

1564

|                                                                                                                                                                                                                                                                                                                                                                                                                                       |                                                                                                                                                                                                                                                                                                                              |
|---------------------------------------------------------------------------------------------------------------------------------------------------------------------------------------------------------------------------------------------------------------------------------------------------------------------------------------------------------------------------------------------------------------------------------------|------------------------------------------------------------------------------------------------------------------------------------------------------------------------------------------------------------------------------------------------------------------------------------------------------------------------------|
| 1007/s10887-023-09230-y                                                                                                                                                                                                                                                                                                                                                                                                               | 1565                                                                                                                                                                                                                                                                                                                         |
| Wasko C, Sharma A, Pui A (2021) Linking temperature to catastrophe damages from hydrologic and meteorological extremes. <i>Journal of Hydrology</i> 602:126731. <a href="https://doi.org/10.1016/j.jhydrol.2021.126731">https://doi.org/10.1016/j.jhydrol.2021.126731</a> , URL <a href="https://www.sciencedirect.com/science/article/pii/S0022169421007812">https://www.sciencedirect.com/science/article/pii/S0022169421007812</a> | 1566<br>1567<br>1568<br>1569<br>1570                                                                                                                                                                                                                                                                                         |
| Zou Z, Li C, Wu X, et al (2024) The effect of day-to-day temperature variability on agricultural productivity. <i>Environmental Research Letters</i> 19(12):124046. <a href="https://doi.org/10.1088/1748-9326/ad8ede">https://doi.org/10.1088/1748-9326/ad8ede</a> , URL <a href="https://doi.org/10.1088/1748-9326/ad8ede">https://doi.org/10.1088/1748-9326/ad8ede</a> , publisher: IOP Publishing                                 | 1571<br>1572<br>1573<br>1574<br>1575<br>1576<br>1577<br>1578<br>1579<br>1580<br>1581<br>1582<br>1583<br>1584<br>1585<br>1586<br>1587<br>1588<br>1589<br>1590<br>1591<br>1592<br>1593<br>1594<br>1595<br>1596<br>1597<br>1598<br>1599<br>1600<br>1601<br>1602<br>1603<br>1604<br>1605<br>1606<br>1607<br>1608<br>1609<br>1610 |
